16 **Abstract**

17 Bacterial wilt (BW) is a soil-borne disease that severely impacts plant growth and productivity  
18 globally. Ubiquitination plays a crucial role in disease resistance. Our previous research  
19 indicated that NAC transcription factor SmNAC negatively regulates BW resistance in  
20 eggplant (*Solanum melongena*). However, whether the ubiquitin/26S proteasome system (UPS)  
21 participates in this regulation is unknown.

22 This study used SmNAC as a bait to screen eggplant cDNA library and obtained  
23 SmDDA1b, an E3 ubiquitin ligase. Subcellular location and bimolecular fluorescence  
24 complementation assays revealed that SmDDA1b could interact with SmNAC in the nucleus.  
25 The *in vivo* and *in vitro* ubiquitination experiments indicated that SmDDA1b can degrade  
26 SmNAC through UPS. However, the discovery of negative regulation of SmDDA1b expression  
27 by SmNAC showed that there was a negative feedback loop between SmNAC and SmDDA1b  
28 in eggplant.

29 The *SmDDA1b*-overexpressed lines showed a higher BW resistance associated with high  
30 expression levels of salicylic acid (SA)-related genes and SA content than the wild-type lines.  
31 However, *SmDDA1b*-silencing lines showed the opposite results, indicating that *SmDDA1b* is a  
32 positive regulatory gene for BW resistance.

33 This study provides a candidate gene that can enhance BW resistance in eggplants. In  
34 addition, it provides insight into a mechanism that promotes plant disease resistance via the  
35 SmDDA1b-SmNAC-SA pathway.

36

37 **Introduction**

38 Bacterial wilt (BW) is a soil-borne bacterial disease caused by *Ralstonia solanacearum* species  
39 complex (RSSC) (Safni *et al.*, 2014), with diverse strains and a wide range of hosts. Hayward  
40 (1991) estimates that it can infect about 450 plant species in 54 families, including major cash  
41 crops and vegetables, especially *Solanaceae* crops. RSSC is one of the most common bacteria  
42 causing severe plant diseases globally (Mansfield *et al.*, 2012; Kim *et al.*, 2016). RSSC enters  
43 the plant xylem through the intercellular space for self-reproduction and secretes several  
44 extracellular polysaccharides and extracellular proteases. This blocks the vascular bundles and  
45 causing plants to die due to lack of water (McGarvey *et al.*, 1999; Huang and Allen, 2000).

46           However, plants also resist BW in multiple ways, regulated at the DNA, transcription,  
47 translation, and post-translational levels. Studies have shown that heterologous overexpression  
48 of *Arabidopsis thaliana* gene *AtEFR* can reduce the effect of BW in tomato (*Solanum*  
49 *lycopersicum*) and potato (*Solanum tuberosum*) (Boschi *et al.*, 2017; Kunwar *et al.*, 2018).  
50 StNACb4 transcription factor positively regulates BW resistance in tomatoes at the  
51 transcriptional level (Chang *et al.*, 2020). Moreover, transcription factor bHLH93 interacts with  
52 RSSC effector Ripl to induce plant immune response in tobacco (*Nicotiana tabacum*) (Tahir  
53 *et al.*, 2017). RRS1-R can recognize RSSC Avr protein in *Arabidopsis* and act as dual resistance  
54 proteins with RPS4 for disease resistance (Tasset *et al.*, 2010; Narusaka *et al.*, 2014). Gong *et al.*  
55 (2021) showed that some histone deacetylase (HDAC)-mediated histone acetylation can  
56 reduce tomato resistance to BW at the post-translation level. Besides, Yu *et al.* (2020) found  
57 that phosphorylation of the *SGT1* gene is beneficial to BW resistance.

58           Isochorismate synthase (ICS) and phenylalanine ammonia lyase (PAL) synthesize  
59 salicylic acid (SA). Besides, the ICS pathway synthesizes more than 90% of SA in disease  
60 resistance response (Wildermuth *et al.*, 2001; Garcion *et al.*, 2008). There are two *ICS* genes in  
61 *Arabidopsis*, *ICS1/SID2* and *ICS2* (Dempsey *et al.*, 2011). MdWRKY15 increases SA  
62 accumulation via *MdICS1* activation (Zhao *et al.*, 2020). OsWRKY6 increases SA content via  
63 *OsICS1* activation (Choi *et al.*, 2015). Lowe-Power *et al.* (2016) showed that SA can inhibit the  
64 expression of type III effectors of RSSC. External application of SA can increase *CaWRKY22*  
65 expression, thus enhancing BW resistance to pepper (*Capsicum annuum*) (Hussain *et al.*, 2018).  
66 *NtWRKY50* overexpression enhances BW resistance in tobacco while significantly increasing  
67 SA levels (Liu *et al.*, 2017). SA pathway signal genes also positively regulate plant disease  
68 resistance. Previous studies have shown that SA signaling transduction through *NPR*, *TGA*,  
69 *NPRI*, *TGA2.2*, and *TGA1a* positively regulates tomato BW resistance (Chen *et al.*, 2009; Li *et al.*  
70 *et al.*, 2019). *EDS1*, *PAD4*, *NPRI* and *SGT1* positively regulates eggplant BW resistance (Xi-ou *et al.*  
71 *et al.*, 2016). *PR* gene expression is induced when the plant is stressed and the SA content  
72 increases (Lu *et al.*, 2018).

73           Furthermore, ubiquitination is as important as phosphorylation and acetylation in  
74 eukaryotes. Ubiquitin/26S proteasome system (UPS) is a conserved ubiquitination system  
75 (Pickart and Fushman, 2004). Ubiquitin (Ub) interacts with the target protein in UPS through

76 E1 (ubiquitin-activating) enzyme, E2 (ubiquitin-conjugating) enzyme, and E3 ubiquitin ligase  
77 via ATP for single ubiquitination or repeated polyubiquitination. This degrades or modifies the  
78 protein composition to regulate the function of eukaryotes (Thrower et al., 2000; Rowland et  
79 al., 2005). E3 ligases are mainly divided into HECT E3s, RING E3s, and RBR E3s. The RING  
80 family is the largest, containing a zinc or U-box binding domain (Stone et al., 2005; Morreale  
81 and Walden, 2016). Cullin-RING-Ligases (CRLs) are multi-subunit complexes and the largest  
82 family in the RING E3s. It is composed of scaffold protein Cullin, RBX1 protein-containing  
83 RING domain, adaptor, and substrate receptor (Zimmerman *et al.*, 2010).

84 CUL1, CUL3, CUL4, and APC are the major cullin types in plants. CRL4 (CUL4A or  
85 CUL4B) uses DDB1 as an adaptor and DDB1 and cullin 4-related factors (DCFA) as substrate  
86 receptors (Pang *et al.*, 2019). DDB1 and DET1-associated protein1 (DDA1) is a basic  
87 conservative component in the CRL4 core complex that directly interacts with DDB1 to  
88 promote substrate recruitment or regulate the overall topology of the CRL4-substrate complex  
89 (Olma *et al.*, 2009; Shabek *et al.*, 2018). DDA1 was first identified as a subunit of the plant  
90 DDB1-DET1-DDA1 (DDD) complex (Yanagawa *et al.*, 2004). DDA1 (Q9FFS4) forms a  
91 protein complex with Cul4, DDB1, COP10, and DET1 in *Arabidopsis*, which binds Ub on E2  
92 to the abscisic acid (ABA) receptor protein PYL8 for complete ubiquitination (Irigoyen *et al.*,  
93 2014). Studies have also shown that E3 ligase plays a crucial role in plant resistance to disease,  
94 including BW (Lee *et al.*, 2020; McLellan *et al.*, 2020). For instance, both the E3 ligase  
95 NtRNF217 in tobacco (Liu *et al.*, 2021) and the ATL family gene *StACRE* in potato (Park *et al.*,  
96 2012) can positively regulate plant resistance to BW.

97 Studies have found that many *Solanaceae* crops are not immune to BW (Patil *et al.*,  
98 2012). However, eggplant (*Solanum melongena*), as a representative *Solanaceae* crop, is an  
99 important vegetable with high BW resistance and sensitivity, making it ideal for BW analysis.  
100 Previous research found that eggplant *SmPGHI* is a BW resistance gene (Wang et al., 2020).  
101 Besides, eggplant AG91-25 possesses resistance locus *EBWR9*, and the RSSC *ripAX2* gene can  
102 induce AG91-25 specific resistance (Morel *et al.*, 2018). Xi'ou *et al.* (2015) indicated that the  
103 eggplant *RE- bw* gene can interact with the effector Popp2 of RSSC. Qiu *et al.* (2019) also  
104 showed that spermidine (SPD) significantly improves eggplant resistance to BW, and  
105 *SmMYB44* enhances *SmSPDS* expression. However, there is little research on plant resistance

106 to BW at the post-translational level. Moreover, it is unclear whether UPS is involved in the  
107 regulation of BW.

108 Our previous research showed that eggplant NAC transcription factor SmNAC  
109 (KM435267) binds to the promoter of SA synthesis gene *ICS1* to inhibit SA accumulation,  
110 thereby reducing eggplant BW resistance (Na *et al.*, 2016). This study used SmNAC protein as  
111 a bait to screen an E3 ubiquitin ligase gene, *SmDDA1b* (GenBank accession number:  
112 MZ736671) that interact with SmNAC from the eggplant cDNA library. Besides, this study  
113 verified the function of *SmDDA1b* and the relationship between SmDDA1b and SmNAC.  
114 Therefore, this research provides new insights into the molecular mechanism by which the  
115 SmDDA1b-SmNAC-SA pathway enhances BW resistance.

116

117

## 118 **Results**

### 119 **Isolation of eggplant E3 ligase gene *SmDDA1b***

120 Previous research showed that *SmNAC* can reduce eggplant BW resistance (Na *et al.*, 2016).  
121 Herein, the N-terminal 417bp base of *SmNAC* containing the NAM domain without self-  
122 activation was used as the bait protein to screen the eggplant cDNA library. *SmDDA1b*, 1017bp  
123 nucleic acid fragment containing E3 ubiquitin ligase gene was identified. Y2H assay of  
124 *SmDDA1b* and *SmNAC* was then conducted. AD-*SmDDA1b* and BD-*SmNAC*<sub>1-417</sub> co-  
125 transferred to Y2H Gold developed plaque on the four amino acids deficiency medium (SD/-  
126 Leu-His-Trp-Ade). The plaque turned blue after the addition of X- $\alpha$ -Gal (Fig. 1A). These  
127 results indicate that *SmDDA1b* can interact with *SmNAC*.

128 The ORF of *SmDDA1b* (504bp, 167 amino acids, and molecular weight of 18.27 kDa) had  
129 DDA1 and SAP domain, belonging to E3 ubiquitin ligase of CRL4 (Supplemental Fig. S1).  
130 Fifteen representative dicotyledonous plants with sequenced genomes, including eggplant,  
131 were selected for phylogenetic analysis. Each genome was screened to obtain the homologous  
132 protein of *SmDDA1b* (Fig. 1B). They all contained DDA1 and SAP domains except BrDDA1b  
133 and NtDDA1b1, indicating that these domains are relatively conserved in dicotyledonous  
134 plants and may play a crucial role in the survival and evolution of plants.

135

### 136 ***SmDDA1b* interacts with *SmNAC* in the nucleus**

137 Subcellular localization and BiFC experiments were used to determine the position of  
138 interaction between *SmDDA1b* and *SmNAC* at the subcellular level. The fluorescence  
139 microscope showed that the nucleus of tobacco emitted green fluorescence, indicating that  
140 *SmDDA1b* is expressed in the nucleus (Supplemental Fig. S4). In the BiFC assay, YNE-  
141 *SmDDA1b* and YCE-*SmNAC* produced a small amount of yellow fluorescence in the nucleus  
142 when the proteasome inhibitor MG132 was not injected. However, after MG132 injection, the  
143 amount of yellow fluorescence in the nucleus increased, indicating that *SmDDA1b* can interact  
144 with *SmNAC* in the nucleus (Fig. 2A). Therefore, *SmNAC* could be the ubiquitination  
145 substrate of *SmDDA1b*.

146

### 147 ***SmDDA1b* has E3 activity and interacts with *SmNAC* *in vitro***

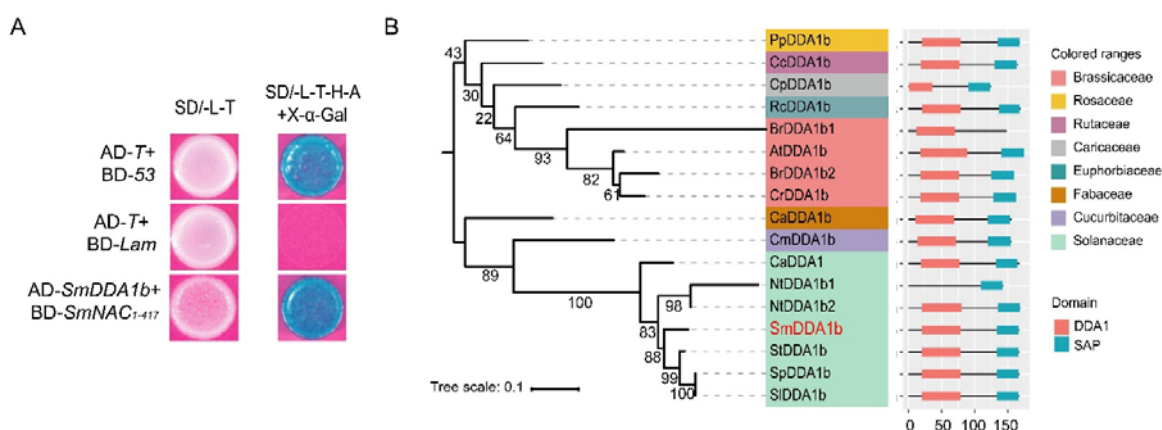

Figure 1. Interaction between SmDDA1b and SmNAC in the yeast two-hybrid (Y2H) system. A, Y2H results of SmNAC and SmDDA1b. The co-transformation of BD-53, BD-Lam and AD-T with Y2H Gold as a positive or negative control. B, SmDDA1b phylogeny analysis results. The number on the branch represents the degree of support, and the maximum value is 100. The genome accession number of the gene is shown in Table S3.

148 A self-ubiquitination experiment was conducted to verify whether SmDDA1b can recognize  
 149 and degrade SmNAC through the UPS. Polyubiquitination occurred when E1, E2, Ub and  
 150 MBP-SmDDA1b were all present (Fig. 2B). In contrast, polyubiquitination did not occur in  
 151 other groups without essential components, indicating that SmDDA1b has E3 ubiquitin ligase  
 152 activity.

153 The ubiquitination experiment was then conducted to determine if SmNAC is the target  
 154 protein of SmDDA1b *in vitro*. (Fig. 2C). A purified GST-SmNAC protein was added into the  
 155 reaction system containing the above mixture. ZEN-BIOSCIENCE (Chengdu, China) anti-GST  
 156 antibody was used for western blot (WB) analysis after the reaction was over to detect whether  
 157 Ub, MBP-SmDDA1b protein, and GST-SmNAC protein were coupled. The ladder-like smear  
 158 appeared only when all the necessary components were present, indicating that SmNAC  
 159 polyubiquitination occurred. Therefore, SmDDA1b can ubiquitinate SmNAC *in vitro*.

160

### 161 **SmDDA1b can degrade SmNAC after ubiquitination *in vivo***

162 Co-IP experiment was performed to further verify the actual ubiquitination of SmDDA1b and  
 163 SmNAC protein *in vivo*. SmDDA1b-HA and SmNAC-GFP fusion proteins were detected in the  
 164 protein complex immunoprecipitated with an anti-HA antibody. An indication that SmDDA1b-  
 165 HA can immunoprecipitate SmNAC-GFP (Fig. 3A). Therefore, SmDDA1b and SmNAC can  
 166 interact *in vivo*.

167 SmDDA1b-Myc and SmNAC-GFP *Agrobacterium tumefaciens* were subjected to tobacco  
 168 transient expression experiments. Anti-GFP and anti-Ub were used for WB detection. The

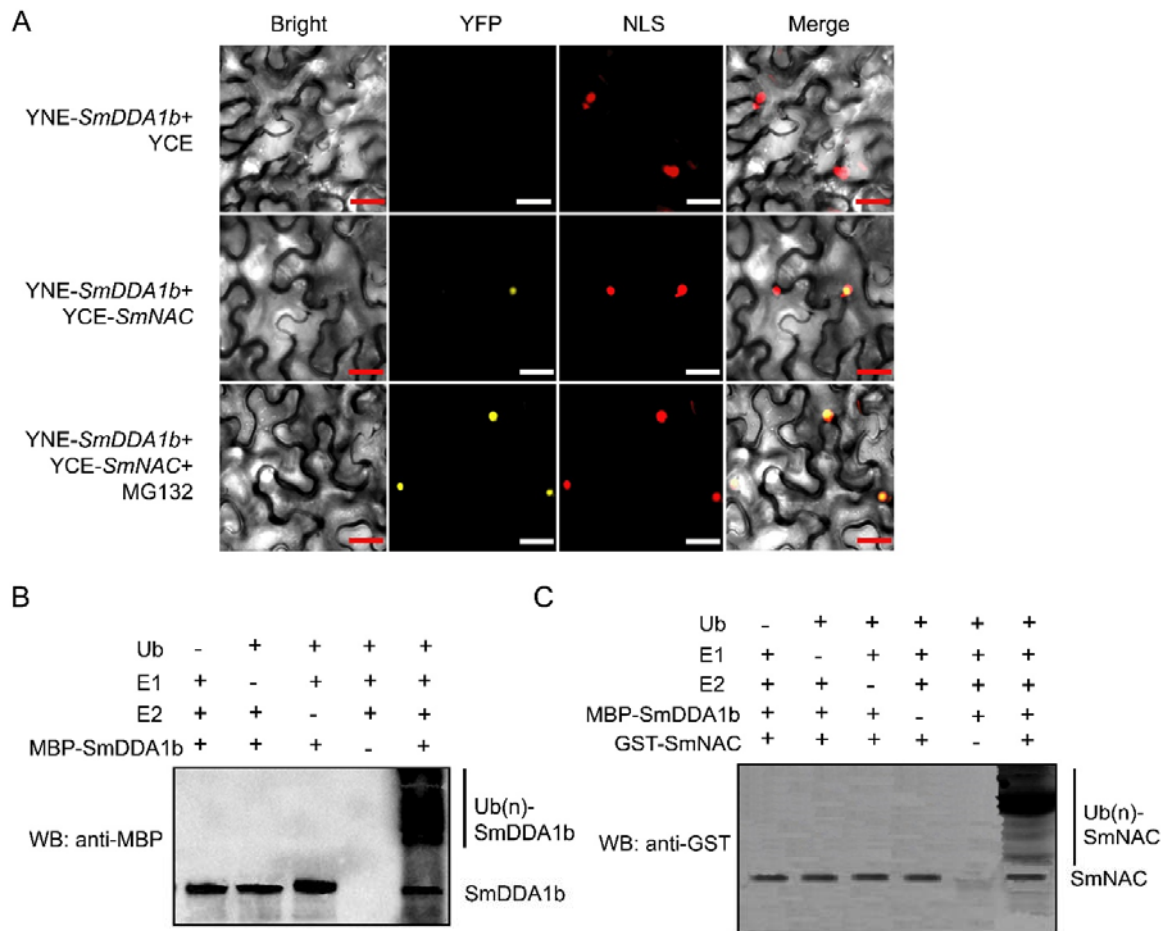

Figure 2. Interaction between SmDDA1b and SmNAC in the nucleus and *in vitro*. A, Bimolecular fluorescence complementation (BiFC) results of SmDDA1b and SmNAC. The proteasome inhibitor MG132 was injected after co-injection of YNE-SmDDA1b and YCE-SmNAC *Agrobacterium tumefaciens* in tobacco. YFP indicates yellow fluorescence caused by the interaction between two proteins. NLS indicates the location of the nucleus. The red and white rulers indicate 1 mm. B, The result of E3 ubiquitin ligase activity of SmDDA1b. The symbols "-" and "+" indicate samples not added and those added in the experiment, respectively. A single band represents the SmDDA1b protein, and a ladder-like smear represents the polyubiquitination of SmDDA1b. C, SmNAC ubiquitination via SmDDA1b *in vitro*. A single band represents the SmNAC protein, and the ladder-like smear represents the polyubiquitination of SmNAC.

169 polyubiquitination band of SmNAC appeared when the two *Agrobacterium tumefaciens* were  
 170 co-injected. However, anti-GFP showed SmNAC-GFP band, while anti-UB showed no band  
 171 when only SmNAC-GFP was injected. Therefore, SmDDA1b can modify SmNAC via  
 172 polyubiquitination *in vivo* (Fig. 3B).

173 The *Agrobacterium tumefaciens* containing Myc-SmNAC and SmDDA1b-GFP constructs  
 174 were infiltrated into tobacco leaves for transient expression. The expression of SmNAC protein  
 175 gradually decreased as the injection ratio of SmDDA1b-GFP protein increased (Fig. 3C). The  
 176 results further indicate that SmDDA1b can ubiquitinate SmNAC in plants and degrade



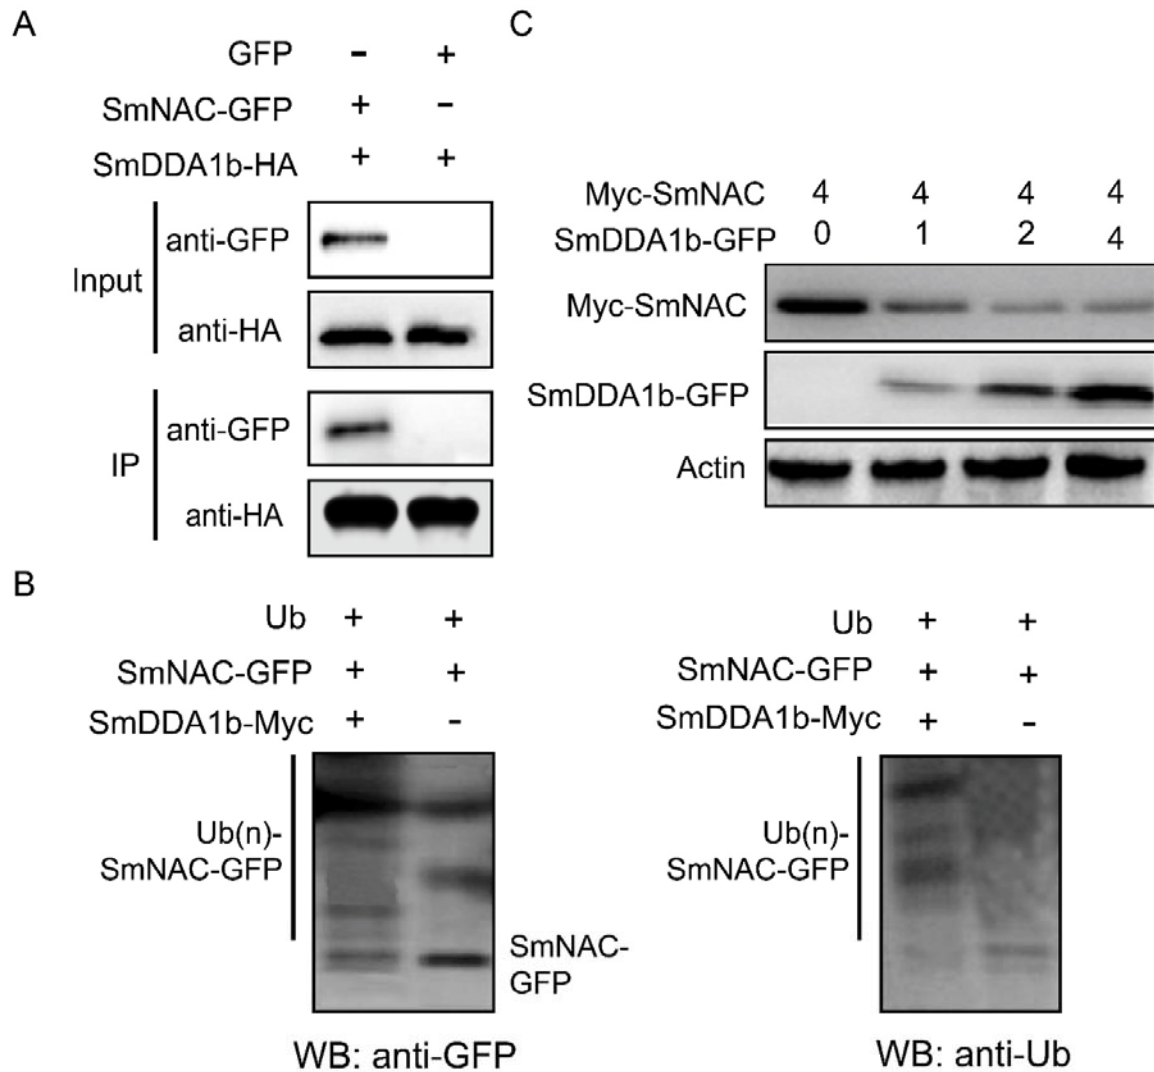

Figure 3. *In vivo* ubiquitination experiment results of SmDDA1b and SmNAC. A, Co-immunoprecipitation (Co-IP) experiment results. Anti-GFP and anti-HA were used for WB detection. B, *In vivo* SmNAC ubiquitination via SmDDA1b. The symbols "-" and "+" indicate samples not added and those added in the experiment, respectively. C, Effect of SmDDA1b-GFP *Agrobacterium tumefaciens* on the expression level of SmNAC protein. Different numbers represent different injection ratios. Anti-Myc and anti-GFP were used for WB detection, and actin was used as a control.

177 SmNAC via UPS.

178

### 179 Expression pattern analysis of *SmDDA1b* in eggplant

180 Analysis of *SmDDA1b* cDNA sequence was not significantly different between the resistant  
 181 line E31 and susceptible line E32 (Supplemental Fig. S2). The qRT-PCR assay result showed  
 182 the expression of *SmDDA1b* was expressed in the roots, stems, and leaves in both of E31 and

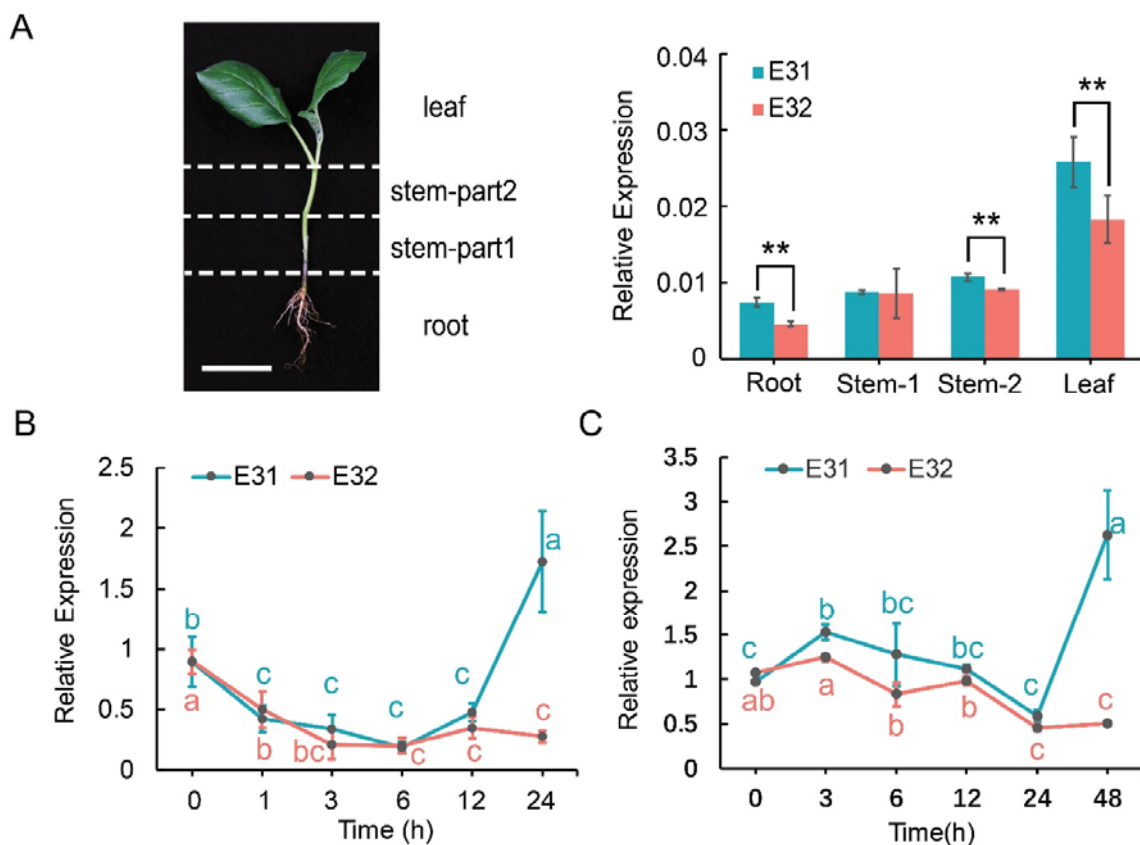

Figure 4. Expression analysis of *SmDDA1b*. A, The relative expression of *SmDDA1b* in E31 and E32 tissues. The left part shows a schematic diagram of the tissue parts of eggplant seedlings (leaves, upper and lower parts of the stems, and roots). The bar graph shows the relative expression of *SmDDA1b* in the roots, stems-part1, stems-part2, and leaves of eggplant E31 and E32. Data are expressed as mean  $\pm$  SD (n=3) (\*,  $p < 0.05$ ; \*\*,  $p < 0.01$ , according to Student's t-test). The white ruler indicates 5 cm. B, The analysis of the relative expression of *SmDDA1b* after 24 h of E31 and E32 inoculation with pathogen. The samples were obtained at 0 h, 1 h, 3 h, 6 h, 12 h and 24 h after treatment. C, The relative expression of *SmDDA1b* after 48 h of E31 and E32 treatment with SA. The samples were obtained at 0 h, 3 h, 6 h, 12 h, 24h and 48 h after treatment. Data are expressed as mean  $\pm$  SEM of three biological replicates. The letter notation indicates the results of multiple comparisons between the data ( $p < 0.05$ ).

183 E32. Notably, the expression level of *SmDDA1b* was higher in E31(R) than in E32(S) (Fig. 4A).

184 After inoculated RSSC into E31 (R) and E32 (S), the qRT-PCR results showed that the  
185 expression level of *SmDDA1b* decreased within one hour in both lines. However, *SmDDA1b*  
186 expression rapidly increased in E31 (R) after 12 h of inoculation and was not altered in E32 (S)  
187 (Fig. 4B). Therefore, the expression level of *SmDDA1b* could be induced by RSSC in the  
188 resistant line E31.

189 At the same time, the expression of *SmDDA1b* in E31 also could be enhance from 0 h to 3  
190 h and rapidly increased after 24 h by SA treatment. However, the expression of *SmDDA1b* in  
191 E32 decreased continuously after SA treatment (Fig. 4C). This result indicates that the

192 expression of *SmDDA1b* in E31 could be induced by exogenous SA.

193

#### 194 ***SmDDA1b*-silenced eggplant has a decreased BW resistance**

195 VIGS experiment was conducted to verify whether *SmDDA1b* is related to BW resistance.

196 *SmNAC* expression was significantly increased in E31 when *SmDDA1b* expression was

197 reduced (Fig. 5A). Moreover, after inoculation with RSSC, *SmDDA1b*-silenced lines showed

198 clear wilt symptoms and the disease index and morbidity of the *SmDDA1b*- silenced lines

199 were 70 and 100%, respectively, which were much higher than in control (Fig. 5, B-C). These

200 results indicate that *SmDDA1b* positively regulates eggplant resistance to BW.

201

#### 202 ***SmDDA1b* overexpression enhances BW resistance and increases SA content**

203 *SmDDA1b* in tomato cultivar Money Marker was over-expressed to further verify its function.

204 The marker gene *bar* and qRT-PCR were used to obtain 12 T<sub>0</sub> transgenic tomato seedlings from

205 60 tissue culture seedlings (Fig. 6A). Three individual plants (OET<sub>0-12</sub>, OET<sub>0-17</sub>, OET<sub>0-31-2</sub>) with

206 good over-expression effects were selected for T<sub>1</sub> generation propagation (Fig. 6B). Finally,

207 115 of the 150 individual plants containing *bar* gene were identified using the *bar* marker, and

208 used for subsequent experiments (Supplemental Table S5). After inoculated with RSSC, the

209 WT seedlings were wilted, while the over-expressed seedlings were partially wilted after 7

210 days and 14 days of inoculation, indicating that over-expressed seedlings are more resistant to

211 BW than the WT plants (Fig. 6, C-D). Besides, the WT and over-expressed seedlings had the

212 same onset time, and both began to show wilting symptoms on the sixth day. However, the

213 morbidity and disease index of WT plants were significantly higher than those of the over-

214 expressed plants after 14 days of inoculation (Fig. 6, E-F; Supplemental Table S6). Taken

215 together, these results indicate that *SmDDA1b* over-expression can increase plant BW

216 resistance.

217 Besides, SA content of WT and *SmDDA1b* over-expressing seedlings inoculated (or not)

218 with RSSC was determined. SA content was significantly lower in WT than in over-expressed

219 seedlings before and after inoculation, indicating that over-expression of *SmDDA1b* in tomato

220 can increase SA content. The SA content of both WT and over-expressed lines was

221 significantly increased after inoculation (Fig. 6G). Therefore, *SmDDA1b* can regulate plant

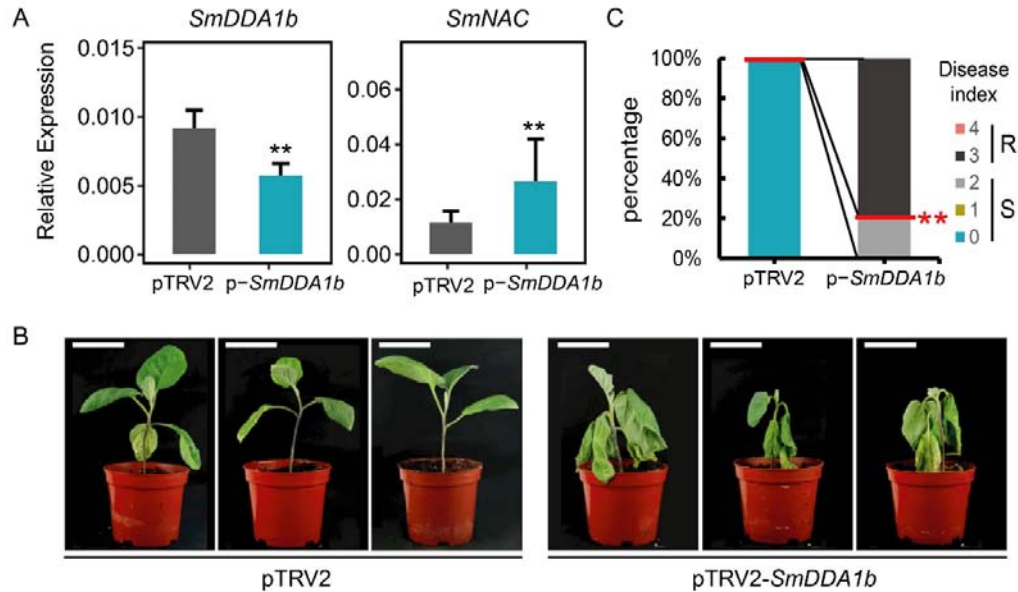

Figure 5. Virus-induced gene silencing (VIGS) experiment results of *SmDDA1b* in E31. A, The relative expression results of *SmDDA1b* and *SmNAC* in *SmDDA1b*-silenced plants. pTRV2 represents the control group, and p-*SmDDA1b* indicates VIGS-treated plants pTRV2-*SmDDA1b*. Data are expressed as mean  $\pm$  SEM of three biological replicates (\*\*,  $p < 0.01$ , according to Student's t-test). B, The phenotype of E31 VIGS control and treated plants infected with *Ralstonia solanacearum* species complex (RSSC) for four weeks. The white ruler indicates 5 cm. C, The results of VIGS and control plant disease index four weeks after inoculation with RSSC. The evaluation scale was as follows: 0= healthy, 1= one or two leaves, wilted, 2= three or more leaves wilted, 3= all leaves wilted, and 4= dead (Qiu *et al.*, 2019). The ordinate represents the percentage of the number of plants in each disease level. Ten E31 seedlings were silenced.

222 resistance to BW by altering SA content. Moreover, the expression of *SmNAC* was significantly  
 223 decreased in *SmDDA1b* over-expressed lines compared with the WT (Fig. 6H), which was  
 224 consistent with the study that *SmDDA1b* could degrade *SmNAC* through UPS.

225

### 226 ***SmDDA1b* indirectly and positively regulates *ICS1* and SA pathway gene expression**

227 *ICS1* can synthesize SA, in order to detect whether *SmDDA1b* affects *ICS1*, the expression of  
 228 *ICS1* (NM\_001247865.1) in *SmDDA1b* over-expressed and VIGS plants was analyzed. In the  
 229 over-expressed plants, the expression of *ICS1* was increased, and in the VIGS plants, the *ICS1*  
 230 expression was decreased, indicating that *SmDDA1b* can positively regulates the expression of  
 231 *ICS1* (Fig. 7A). Besides, Y2H and BiFC results of *SmDDA1b* and *ICS1* show that *SmDDA1b*  
 232 can not directly target *ICS1* (Supplemental Fig. S5). The results deduced that *SmDDA1b*  
 233 degrade *SmNAC* to positively increase activity of *ICS1*.

234 This study also analyzed the expression of hormone signal pathway-related genes in

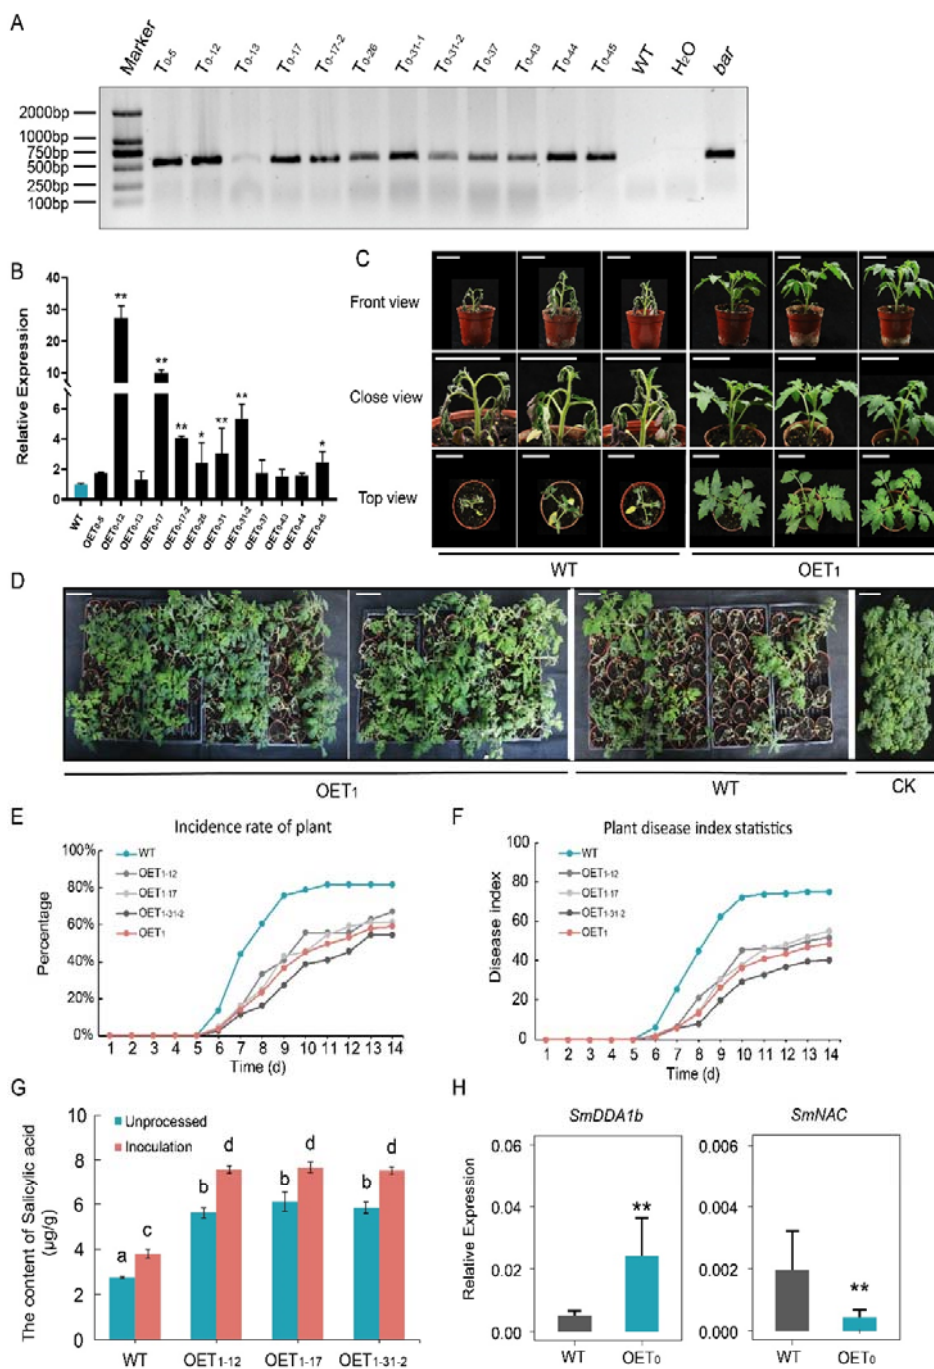

Figure 6. Results of overexpression experiment. A, Detection of the marker gene *bar* on tomato tissue culture seedlings. B, The relative expression of *SmDDA1b* in tomato independent lines obtained from tissue culture. Data are expressed as mean  $\pm$  SD ( $n=3$ ) (\*,  $p < 0.05$ ; \*\*,  $p < 0.01$ , according to Student's t-test). C, The phenotype of wild-type (WT) and T<sub>1</sub> generation overexpressed seedlings (OET<sub>1</sub>), including front view, close view, and top view on the 7th day after inoculation with RSSC. The white ruler indicates 5 cm. D, The phenotype of WT and OET<sub>1</sub> on the 14th day post-inoculation with RSSC. CK represents WT and transgenic tomato seedlings that were not inoculated with RSSC. The white ruler indicates 1 dm. E-F, The morbidity statistics and disease index of WT and overexpressed seedlings after 14 days of inoculation. OET<sub>1</sub> represents the average disease index of three overexpressed lines. G, SA content of WT and overexpressed tomato seedlings inoculated or not inoculated with RSSC. The letters indicate significant differences ( $p < 0.05$ ). H, The relative expression of *SmNAC* in *SmDDA1b* overexpressed lines. Data are expressed as mean  $\pm$  SEM of three biological replicates (\*,  $p < 0.05$ ; \*\*,  $p < 0.01$ , Student's t-test).

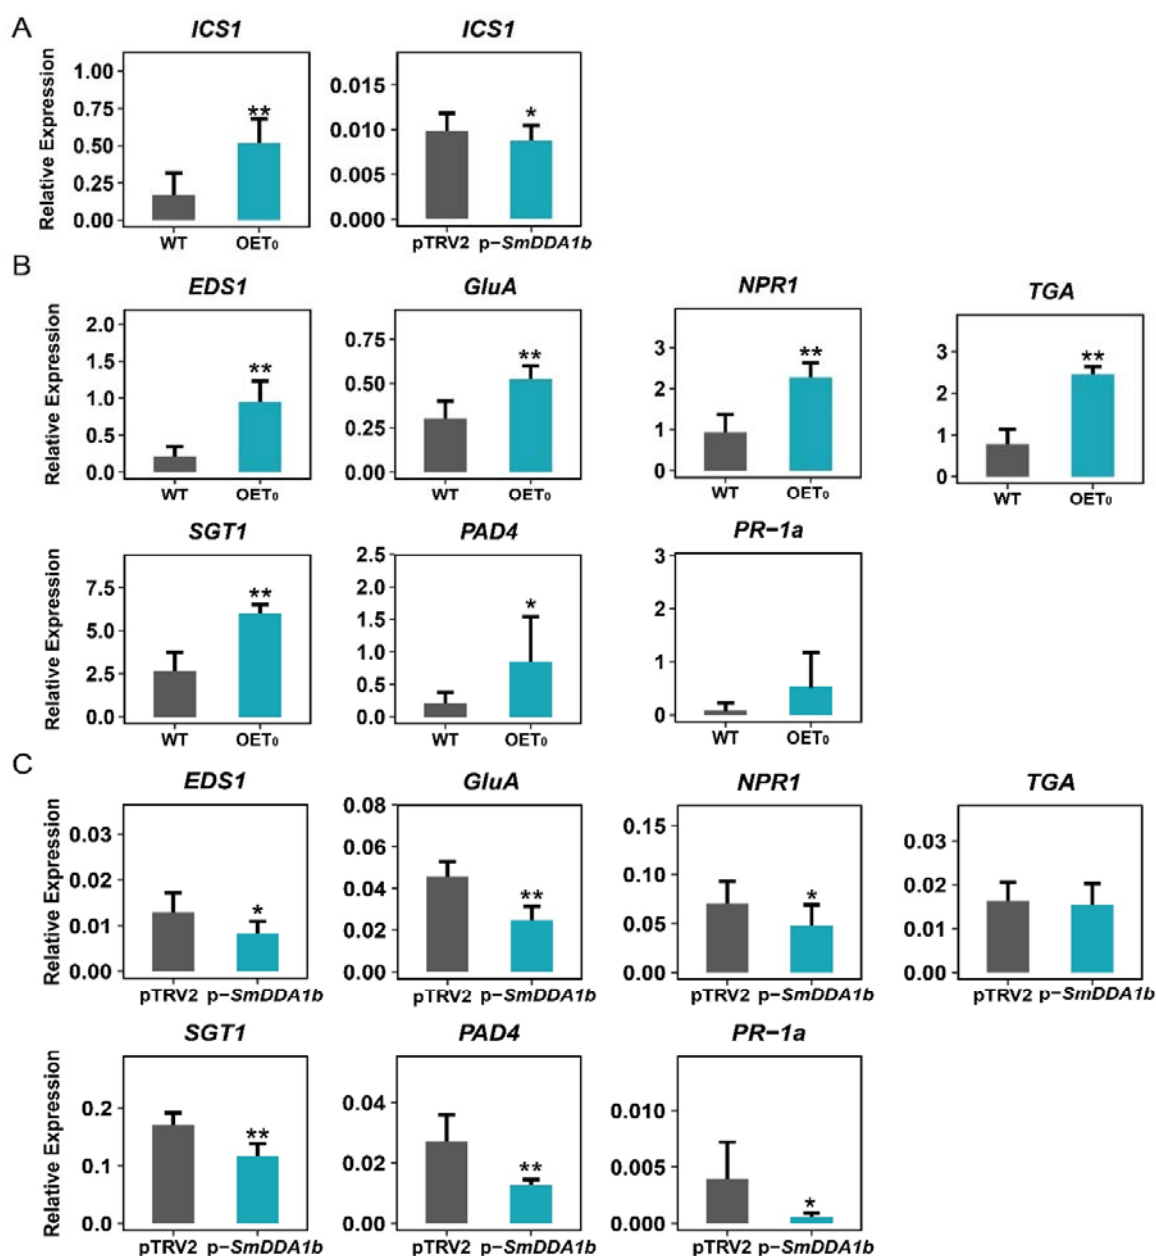

Figure 7. Expression of *ICS1* and salicylic acid (SA) pathway signal-related genes in *SmDDA1b* overexpressed and virus-induced gene silencing (VIGS) plants. A, Expression of *ICS1* in *SmDDA1b* overexpression and VIGS plants. B, Expression of SA pathway signal-related genes in overexpressed plants. OET<sub>0</sub> represents the T<sub>0</sub> generation over-expressed plants. and WT represents the wild-type plants. C, Expression of SA pathway signal-related genes in VIGS plants. pTRV2 represents control plants, and p-*SmDDA1b* represents VIGS-treated plants pTRV2-*SmDDA1b*. Data are expressed as mean ± SEM of three biological replicates (\*,  $p < 0.05$ ; \*\*,  $p < 0.01$ , Student's t-test).

236 (NM\_001247633.1), *TGA* (GQ386946.1), *SGT1* (NM\_001247758.1), *PAD4* (AY753546.1) and  
 237 *PR-1a* (M69247) were selected to assess if SA pathway signal-related genes can regulate BW  
 238 resistance. The expression of SA pathway signal-related genes was significantly increased in  
 239 the over-expressed plants except for *PR-1a* (compared with the control) (Fig. 7B). In contrast,

240 the expression of SA pathway signal-related genes was significantly decreased in VIGS plants  
241 except for TGA (compared with the control) (Fig. 7C), indicating that *SmDDA1b* positively  
242 regulates the expression of SA pathway signal-related genes.

243

#### 244 **SmNAC binds to *SmDDA1b* promoter and significantly represses the promoter activity**

245 In previous studies, *SmNAC* over-expression lines have shown decreased expression of  
246 *SmDDA1b* (Fig. 8A). This suggests that the activity of *SmDDA1b* promoter might be directly  
247 down-regulated by SmNAC. In order to verify this hypothesis, the *SmDDA1b* promoter  
248 sequence was obtained from eggplant genome (Barchi *et al.*, 2021), and the elements of the  
249 promoter were predicted by PlantPAN 3.0 (Supplemental Fig. S6). It was predicted that the  
250 *SmDDA1b* promoter contained 24 NAC element binding sites and these sites are mostly  
251 distributed in the region of - 500 to - 1500, indicating that SmNAC may bind to *SmDDA1b*  
252 promoter, then the promoter was isolated and cloned (Fig. 8B; Supplemental Table S7).

253 Due to the self-activation of *SmDDA1b* promoter, the promoter was divided into three  
254 segments for yeast one-hybrid (Y1H) assay, named *SmDDA1bpro-1*, *SmDDA1bpro-2* and  
255 *SmDDA1bpro-3*, respectively, and divided *SmDDA1bpro-2* into *pro2-1*, *pro2-2*, *pro2-3* (Fig.  
256 8B), among them, *SmDDA1b pro2-3* has self-activation (Supplemental Fig. S7). The results of  
257 Y1H showed that there was no significant difference between pAbAi-*SmDDA1bpro-3* and AD-  
258 *SmNAC* co-transformed to Y1H Gold and the control, no yeast plaque grew on the Leucine  
259 deficiency medium (SD/-L) added with 200ng/ml Aureobasidin A (AbA). However, the  
260 pAbAi-*SmDDA1bpro-1/pro2-1/pro2-2* and AD-*SmNAC* co-transformed to Y1H had significant  
261 yeast plaque growth on SD/-L added with 200ng/ml ABA compared with the control, and the  
262 results remained unchanged after dilution (Fig. 8C). The results showed that SmNAC could  
263 bind to *SmDDA1bpro-1*, *pro-2-1* and *pro-2-2* regions.

264 In order to further verify the regulatory effect of SmNAC on the activity of *SmDDA1b*  
265 promoter, we carried out dual-luciferase assay. We found that the ratio of LUC / REN in the  
266 treatment group was significantly lower than that in the control group, indicating that SmNAC  
267 represses the transcription of *SmDDA1b* (Fig. 8, D-E). In addition, after *Agrobacterium*  
268 *tumefaciens 35S: SmDDA1b*, *35S: SmNAC* and *SmDDA1bpro: LUC* were co-injected into  
269 tobacco, the ratio of LUC / REN increased and the inhibitory effect of SmNAC on the

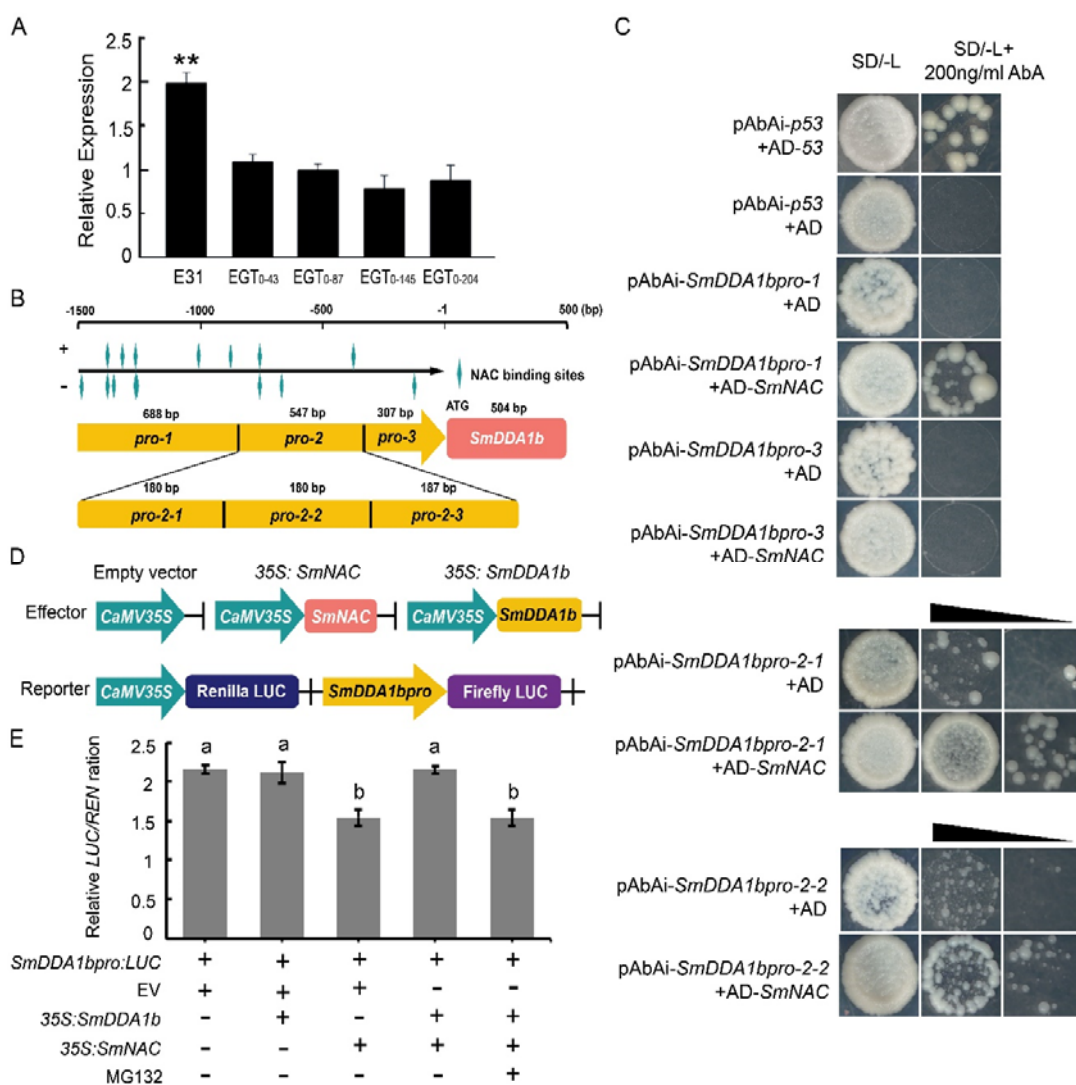

Figure 8. SmNAC binds to the *SmDDA1b* promoter and represses the expression of *SmDDA1b* gene. A, The relative expression of *SmDDA1b* in *SmNAC* over-expressed lines. E31 indicates wild-type, and EGT<sub>0-43</sub>, EGT<sub>0-87</sub>, EGT<sub>0-145</sub>, EGT<sub>0-204</sub> represent To generation over-expressed plants. Data are expressed as mean  $\pm$  SEM of three biological replicates (\*\*,  $p < 0.01$ , Student's t-test). B, Schematic diagram of *SmDDA1b* gene, promoter and NAC element binding sites. "+" represents the sense strand and "-" represents the antisense strand. The promoter of *SmDDA1b* was divided into three segments for Y1H with SmNAC transcription factor. *SmDDA1bpro-1*: -855 to -1542 bp, *SmDDA1bpro-2*: -308 to -854 bp (*SmDDA1bpro-2-1*: -675 to -854 bp, *SmDDA1bpro-2-2*: -495 to -674 bp, *SmDDA1bpro-2-3*: -308 to -494 bp), *SmDDA1bpro-3*: -1 to -307 bp. C, SmNAC binds directly to the *SmDDA1b* promoter. The co-transformation of AD-53, AD and pAbAi-p53 with Y1H Gold as a positive or negative control. The triangle indicates the yeast concentration from high to low. D, A schematic representation of the double reporter and effector plasmid used. The double-reporter plasmid contained *SmDDA1b* promoter fused with the sequence encoding LUC luciferase and REN luciferase driven by *CaMV35S* promoter. The effector plasmid contained *SmNAC* driven by a *CaMV35S* promoter. E, SmDDA1b attenuates the inhibitory effect of SmNAC on SmDDA1b promoter. The regulation of transcription factor on promoter activity is based on the ratio of LUC to REN. The symbols "-" and "+" indicate samples not added and those added in the experiment, respectively. EV represent empty vector. Data are expressed as mean  $\pm$  SEM of three biological replicates. The letter notation indicates the results of multiple comparisons between the data ( $p < 0.05$ ).

270 promoter was eliminated. After MG132 injection, the ratio of LUC/ REN decreased and the



271 inhibitory effect of SmNAC on promoter was restored (Fig. 8E). The results showed that  
272 SmDDA1b could degrade SmNAC through UPS, and the increase of SmDDA1b content could  
273 weaken or even remove the inhibitory effect of SmNAC on *SmDDA1b* promoter.

274

275

## 276 **Discussion**

277 E3 ubiquitin ligase and NAC (NAM-ATAF-CUC1/2) transcription factors are crucial in plant  
278 disease resistance. The E3 ligase has a complex plant disease resistance regulation, including  
279 positive and negative regulation. Besides, some interact with pathogens or post-translational  
280 modifications of other proteins to directly or indirectly regulate plant disease resistance (Miao  
281 et al., 2016; Wang et al., 2020; Karki et al., 2021). For instance, MIEL1 is a RING-type E3  
282 ligase, negatively regulating defense response in *Arabidopsis* (Marino *et al.*, 2013). The E3  
283 ligase NbUbe3R1 positively regulates the immune response in tobacco. Furthermore, the  
284 replicase of *Bamboo mosaic virus* (BaMV) could be a substrate of NbUbe3R1 (Chen *et al.*,  
285 2019). RING-type E3 ligase, VIM5, can target and degrade DNA methyltransferases MET1  
286 and CMT3 through the 26S proteasome. *Beet severe curly top virus* can induce *VIM5*  
287 expression and activate the *C2* and *C3* genes of the geminivirus to make the plant susceptible  
288 (Chen et al., 2020).

289 NAC, as a unique family of transcription factors in plants, is essential at multiple levels of  
290 transcription, post-transcriptional and post-translational modification (Zhu et al., 2016; Zhang  
291 et al., 2018; Li et al., 2019; Liu et al., 2020). Studies have shown that E3 ligase can interact  
292 with NAC transcription factors (Yoshii *et al.*, 2010). SINA protein also has E3 ubiquitin ligase  
293 activity (Wang *et al.*, 2018). The RING-type E3 ligase SINAT5 can ubiquitinate the NAC  
294 transcription factor AtNAC in *Arabidopsis* (Xie *et al.*, 2002). Miao *et al.* (2016) indicated that  
295 SINA can recognize and degrade NAC1 in tomato through the UPS, negatively regulating the  
296 role of plant defense signals.

297 Herein, SmDDA1b ubiquitinated SmNAC *in vivo* and *in vitro*, promoting its degradation  
298 through UPS. However, E3 ubiquitin ligase and NAC transcription factor are only one aspect  
299 of this mechanism. Besides targeting SmNAC, SmDDA1b may also target other factors that  
300 can negatively regulate eggplant BW resistance via ubiquitination and degradation. Therefore,  
301 future research should focus on the regulation network of resistance to BW.

302 Plants balance their gene expression and control the role of E3 ligase and NAC transcription  
303 factors when there is no biological stress. Previous studies have shown that transcription factor,  
304 the target protein of E3 ligase, can also bind to the promoter element of E3 ligase to control the  
305 expression activity of E3. Tong *et al.* (2021) found that *Populus* U-box E3 ligase PalPUB79

306 degraded PalWRKY77 through ubiquitination, at the same time, PalWRKY77 can bind to the  
307 PalPUB79 promoter to represses the expression of PalPUB79 under normal conditions. In  
308 tartary buckwheat (*Fagopyrum tataricum*, TB), the E3 ligase FtBPM3 target protein FtMYB11  
309 can also bind to the *FtBPM3* promoter and directly represses the expression of *FtBPM3* gene  
310 (Ding *et al.*, 2021). Herein, *SmNAC* bind to the promoter element of *SmDDA1b* and negatively  
311 regulate *SmDDA1b*. This regulation effect can inhibit the degradation of *SmNAC* and thus  
312 maintaining the stability of SmNAC protein and E3 ligase.

313 SA and SA signaling pathway genes regulate each other. EDS1 can cause the initial  
314 accumulation of SA and interact with PAD4 to cause further accumulation of SA, which is  
315 located upstream of the signaling pathway (Feys *et al.*, 2001; Wildermuth *et al.*, 2001; Cui *et al.*,  
316 2017). NPR1 acts downstream of the SA signaling pathway and directly affects the SA content  
317 (Ding *et al.*, 2018). SA also promotes the expression of SA signal pathway genes through  
318 positive feedback, thereby rapidly amplify SA signals (Wiermer *et al.*, 2005; Wu *et al.*, 2012;  
319 Oh *et al.*, 2014). Herein, *SmDDA1b* overexpressed caused the increase of SA content and the  
320 relative expression level of signal genes in SA pathway, while *SmDDA1b* was silenced, the  
321 expression of signal genes was decreased, indicating that our research results are consistent  
322 with previous research results.

323 Different signaling pathways interact to form complex signal networks. Plants regulate  
324 different defense signal transduction pathways through this signal network to obtain higher  
325 stress tolerance (Derksen *et al.*, 2013; Checker *et al.*, 2018). Recent studies have also shown  
326 that E3 ligase CUL3<sup>BPM</sup> can target MYC2, MYC3, and MYC4, reduce the abundance of MYC  
327 protein, and regulate the JA pathway (Chico *et al.*, 2020). Moreover, RING-type E3 ligase  
328 KEG can positively regulate the expression of the JA pathway signal-related gene *JAZ12*  
329 (Pauwels *et al.*, 2015). SA and JA signals are mutually antagonistic (Adams and Spoel, 2018;  
330 Nakano and Mukaihara, 2018). Other hormones may also regulate *SmDDA1b* and should be  
331 further verified.

332 Herein, *SmDDA1b* was first decreased, then increased in the resistant plants after  
333 inoculation with RSSC. *SmDDA1b* first decreased, then leveled off in the susceptible plants  
334 after inoculation with RSSC. The inhibition may be related to the immune response of plants  
335 and pathogenic effectors. The innate immune system of plants (the immune response

336 stimulated by pathogen-related molecular patterns, pattern-triggered immunity (PTI), and  
337 effector proteins, effector-triggered immunity (Hernández and Sanan-Mishra)) respond during  
338 pathogen invasion. PTI is a nonspecific basic defense response, while ETI is a specific  
339 response induced by the plant resistance protein to recognize pathogens (Nakano *et al.*, 2017).  
340 During pathogen invasion, plants first induce PTI, after which the pathogen releases effectors  
341 to inhibit PTI, decreasing *SmDDA1b* expression in both resistant and susceptible plants. Plants  
342 then exert an ETI response to inhibit effectors, increasing the *SmDDA1b* expression in disease-  
343 resistant plants.

344 E3 ubiquitin ligase may target the pathogenic effector. Studies have shown that UPS can  
345 specifically recognize pathogenic effectors in plants and play a role in plant-pathogen  
346 interactions (Zhang *et al.*, 2011; Li *et al.*, 2014; Zhang *et al.*, 2020). Drugeon and Jupin (2002)  
347 showed that UPS can target the motor protein 69k of *turnip yellow mosaic virus* (TYMV) and  
348 regulate its activity *in vitro*. The RING-type E3 ligase NtRFP1 can mediate the degradation of  
349 geminivirus-encoded  $\beta$ C1 in tobacco (Shen *et al.*, 2016). RSSC contains various secretion  
350 systems but mainly exerts its effects through the type III secretion system (T3SS). T3SS can  
351 influence the host to cause plant diseases or hypersensitivity response (HR) (Lindgren, 1997;  
352 Poueymiro and Genin, 2009). Therefore, E3 can target the virulence genes and effectors of  
353 RSSC and degrade them via ubiquitination to improve eggplant resistance, based on the  
354 specificity of *SmDDA1b* for the defense response of RSSC. However, further studies are  
355 needed to verify the above phenomenon.

356

## 357 **Conclusions**

358 In summary, this study constructed a *SmDDA1b*-*SmNAC*-*SA* pathway regulatory module  
359 and showed that *SmDDA1b* can degrade *SmNAC* through UPS to enhance BW resistance.  
360 Under normal conditions, *SmNAC* represses the transcription of both *SmDDA1b* and *ICS1* to  
361 maintain the immune balance of plants, endogenous SA levels are low in eggplant (Fig. 9A).  
362 However, *SmDDA1b* gene was up-regulated after inoculating disease-resistant plants with  
363 RSSC, thus decreasing *SmNAC* expression and the inhibitory effect on *SmDDA1b* decreased,  
364 and then increasing *ICS1* expression, SA content and BW resistance (Fig. 9B). Besides,  
365 *SmDDA1b* could not target *ICS1* directly.

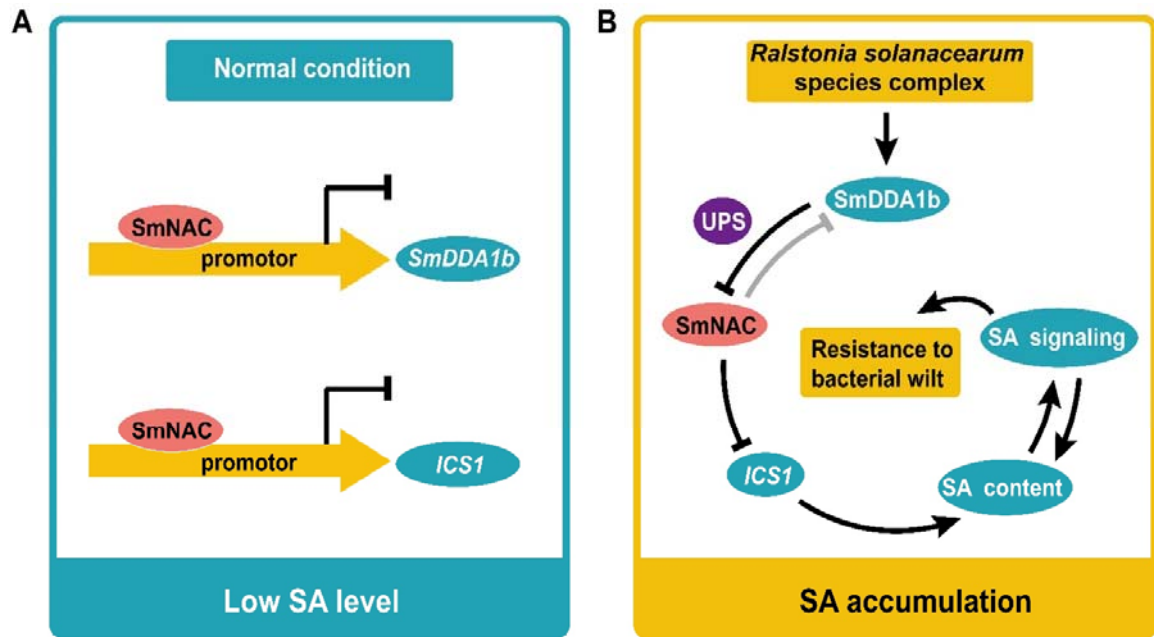

Figure 9. A proposed model for the action mechanism of SmDDA1b. A, SmNAC inhibited the expression level of *SmDDA1b* and *ICS1* under normal condition. B, The regulation module of SmDDA1b improving plant resistance to BW. The expression of *SmDDA1b* increased under RSSC stress weakens the SmNAC-mediated inhibition of SmDDA1b. Moreover, SmNAC-mediated inhibition of *ICS1* was relieved by SmDDA1b-mediated ubiquitination of SmNAC, and thus SA accumulation.

366 Plant defense against pathogens involves complex mechanisms and many aspects. At the  
367 same time, the importance of SA for plant disease resistance is self-evident. Therefore, future  
368 researches should explore: screening of E3 ubiquitin ligase genes that can interact with  
369 SmNAC except *SmDDA1b*; whether SmDDA1b can interact with pathogenic effector proteins  
370 to degrade it via ubiquitination; SmDDA1b can ultimately regulate the content of SA, whether  
371 SmDDA1b has the function of resisting other diseases, or regulating plant resistance and  
372 growth and development.

373

## 374 **Materials and Methods**

### 375 **Experimental materials**

376 This study used two eggplant inbred lines, E31 (resistant to BW, R) and E32 (susceptible to  
377 BW, S) (Supplemental Fig. S3; Supplemental Table S4). Tomato, tobacco, and RSSC strain  
378 used included Money Maker, *Nicotiana benthamiana*, and GMI1000, respectively.

379

### 380 **Data analysis**

381 Total RNA isolation, complementary DNA (cDNA) synthesis, and real-time reverse  
382 transcription-PCR (qRT-PCR) were performed using previously described methods (Qiu *et al.*,  
383 2019). The relative expression amount was calculated using the  $2^{-\Delta ct}$  and  $2^{-\Delta\Delta ct}$  methods (Livak  
384 and Schmittgen, 2001). *18SrRNA* was used as the reference gene. qRT-PCR primers are listed  
385 in Table S2.

386

### 387 **Phylogenetic analysis and sequence alignment**

388 DDA1 containing sequences of 15 dicotyledonous plants (including eggplant) were obtained  
389 by scanning whole-genome protein sequences (Supplemental Table S3) from the NCBI RefSeq  
390 database (O'Leary *et al.*, 2016) using Hmmer v3.3 (Eddy, 1998). Mafft v7.455 was used to  
391 align sequences (Kato and Standley, 2013). Iqtree v1.6.12 (Nguyen *et al.*, 2015) was then  
392 used to construct a phylogenetic tree. Sequence alignment was performed in DNAMAN  
393 (version 7.0; Lynnon Biosoft, Quebec, Canada).

394

### 395 **Subcellular localization analysis**

396 The full-length coding sequence of *SmDDA1b* without the stop codon was cloned into the *Age*  
397 I site of the pEAQ-EGFP vector (Sun *et al.*, 2020). The recombinant vector was introduced into  
398 *Agrobacterium tumefaciens* (strain GV3101(pSoup)) and mixed with *Agrobacterium*  
399 *tumefaciens* with DsRed protein (v: v, 1: 1) (Sun *et al.*, 2020). The nuclear-localized signal  
400 (NLS) was fused to DsRed as a nuclear marker. The mixture was injected into *Nicotiana*  
401 *benthamiana*, then incubated at 22 °C for three days in the dark. A confocal fluorescence  
402 microscope (Carl Zeiss, Germany) was used to visualize green fluorescent protein (GFP)  
403 fluorescence. The experiment was repeated at least thrice. The primers are listed in Table S1.

404

### 405 **Pathogen inoculation**

406 Inoculation with RSSC was performed as described in our previous study with some  
407 modifications (Qiu *et al.*, 2019). Briefly, RSSC was grown in a TTC medium (Lemessa and  
408 Zeller, 2007) at 30 °C for two days. The concentration of the inoculum was then determined  
409 using a spectrophotometer, and OD<sub>600</sub> was adjusted to 0.6. Four- to five-day-old seedlings were  
410 inoculated by wounding the roots, then incubated in the bacterial suspension for 20 min before

411 transplanting. The entire experiment was conducted under control conditions (30 °C, 16 h of  
412 light, and 24 °C, 8 h of dark). The control group was treated with water. Samples (three  
413 biological replicates each) were taken at 0 h, 1 h, 3 h, 6 h, 12 h and 24 h.

414

#### 415 **Hormone treatment**

416 The four- or five- ephyllas- old eggplant seedlings were treated with 1mM SA and sprayed  
417 every 12 hours (Jia et al., 2013; Hussain et al., 2018; Mahesh and Sharada, 2018). The control  
418 group was treated with water, then planted at 26 °C, 16 h light, and 22 °C, 8 h dark. Samples  
419 (three biological replicates each) were obtained at 0 h, 2 h, 6 h, 12 h, 24h and 48 h.

420

#### 421 **Virus-induced gene silencing (VIGS) assays**

422 The specific fragments of about 300 bp from *SmDDA1b* were cloned into *EcoR* I and *Sma* I  
423 sites of the pTRV2 vector. pTRV2-*SmDDA1b*, pTRV2, and pTRV1 vectors were then  
424 transferred into the *Agrobacterium tumefaciens* strain GV3101. pTRV1 mixed with pTRV2 or  
425 pTRV2-*SmDDA1b* (v: v, 1: 1) were infiltrated into four- or five-day-old seedlings using a 1  
426 mL needleless syringe. After injection, the samples were treated at 16 °C in the dark for one  
427 day and then planted normally for 1-2 weeks (26 °C, 16 h light, 22 °C, 8 h darkness). Each  
428 treatment had at least 10 biological replicates. Primers are shown in Table S1.

429

#### 430 **Construction of the *SmDDA1b* overexpression vector and transformation procedures**

431 The forward primer 5'-gagaacacgggggactctagaATGGAGGATACCTCATCATCCATT-3' and  
432 the reverse primer 5'-gtggctagcgtaacactagtTCATGTGTCCCCCTTAACCG-3' were used to  
433 amplify the full-length *SmDDA1b* and cloned into *Xba* I and *Spe* I of the pCAMBIA-1380  
434 vector, then transfected into the *Agrobacterium* strain GV3101. The resulting overexpression  
435 vector, pCAMBIA-1380-*SmDDA1b*, containing the CaMV35S promoter, Nos terminator, and  
436 the *bar* marker gene (5'- end primer ATGAGCCCAGAACGACGCCCCG, 3'- end primer  
437 TTAGATCTCGGTGACGGGCAGGACC) were then transformed into tomato Money Marker.  
438 The transgenic plants were generated as described by Qiu *et al.* (2016).

439

#### 440 **Salicylic acid (SA) extraction and quantification**

441 The leaves from *SIDDA1b*-overexpressed lines and non-transgenic lines (wild type) before and  
442 after inoculation with RSSC were used for SA extraction and determination. SA extraction and  
443 quantification were performed as previously described by Ma *et al.* (2018).

444

#### 445 **Yeast two-hybrid (Y2H) assay**

446 The full-length *SmDDA1b* was cloned into *EcoR* I and *BamH* I sites of the pGADT7 vector.  
447 The other genes or fragments, including the N-terminal 417 bases of *SmNAC*, which did not  
448 exhibit autoactivation, and the full-length ICS1 without the stop codon, were ligated into the  
449 pGBKT7 vector to generate baits. The specific primers and corresponding construction vectors  
450 are shown in Table S1. The experiment was conducted following the manufacturer's  
451 instructions (Cat. No. 630489; Clontech, Mountain View, CA, USA).

452

#### 453 **Bimolecular fluorescence complementation (BiFC) analysis**

454 The full-length *SmDDA1b* without the stop codon was cloned into *Sal* I and *BamH* I sites of the  
455 pSPYNE-35s / pUC-SPYNE (YNE) vector containing the N-terminal of yellow fluorescence  
456 protein (YFP). The other genes without the termination codon were ligated into the pSPYCE-  
457 35s / pUC-SPYCE (YCE) vector containing the C-terminal of YFP. The construct was  
458 introduced into *Agrobacterium tumefaciens* GV3101(pSoup). The samples were mixed with  
459 *Agrobacterium tumefaciens* harboring DsRed protein (v: v: v, 1: 1: 1) injected into *Nicotiana*  
460 *benthamiana*, then planted at 22 °C for three days in the dark. Proteasome inhibitor MG132 (50  
461 μM) was injected (Marques *et al.*, 2009). A confocal fluorescence microscope (Carl Zeiss,  
462 Germany) was used to visualize GFP fluorescence. The experiment was repeated at least thrice.  
463 The primers are listed in Table S1.

464

#### 465 ***In vitro* ubiquitination**

466 The full-length *SmNAC* and *SmDDA1b* were cloned into pGEX-4T and pMAL-c2X vector at  
467 *Sal* I and *Xho* I sites, respectively. The constructs were then transferred to BM Rosetta (DE3).  
468 The ubiquitination reaction mixture (30 μL) contained 600 ng GST-SmNAC protein, 600 ng  
469 MBP-SmDDA1b protein, 20× prepared reaction buffer (1 mM ZnCl<sub>2</sub>, 200 mM MgCl<sub>2</sub>, 1 M  
470 Tris-HCl, 20 mM ATP, 4 mM DTT, 200 mM creatine phosphate), 0.1 unit creatine kinase



471 (Sigma, USA), 50 ng E1 (Boston Biochem, USA), 250 ng E2 (Boston Biochem, USA). Sterile  
472 water was added to make up the solution to 30  $\mu$ L. The reaction was conducted at 37 °C for 60-  
473 90 min. A 7  $\mu$ L of 5 $\times$ Loading buffer was added to a 95 °C water bath for 5 min. The sample  
474 was then centrifuged at 10000 rpm for 1 min to obtain supernatant for SDS-PAGE  
475 electrophoresis. Western blot was conducted as described by Na *et al.* (2016). anti-GST (ZEN-  
476 BIOSCIENCE, China) antibody was used. Primers are listed in Table S1.

477

#### 478 ***In vivo* ubiquitination**

479 The full-length *SmNAC* and *SmDDA1b* were constructed into *Hind* III and *Sal* I sites of  
480 pC1307-35S-Myc and pC2300-35S-GFP vectors, respectively. The extracted plasmids were  
481 transferred into GV3101. The supernatant of *Agrobacterium tumefaciens* (OD<sub>600</sub>= 0.6) was  
482 resuspended in infection buffer (10 mM MgCl<sub>2</sub>, 10 mM MES (pH 5.6), 100  $\mu$ M AS) solution  
483 and allowed to stand for 2-5 h. Myc-SmNAC was then injected into *Nicotiana benthamiana*.  
484 SmNAC expression was unchanged (OD<sub>600</sub>=0.4), while the injection ratio of SmDDA1b was  
485 gradually increased (OD<sub>600</sub>=0-0.4). The samples were incubated at 22 °C for 2 d, and then  
486 western blot analysis was conducted.

487 The *SmNAC*-GFP and *SmDDA1b*-Myc vectors were constructed and transformed into  
488 GV3101. The *Agrobacterium tumefaciens* (OD<sub>600</sub>= 0.6) was resuspended in infection buffer  
489 and allowed to stand for 2- 4 h. The injection of tobacco with *Agrobacterium tumefaciens*  
490 liquid of *SmDDA1b*-Myc and *SmNAC*-GFP was set as control. Only *SmNAC*-GFP was injected  
491 in the treatment group. Western blot analysis was conducted after incubation at 22 °C for two  
492 days. The antibodies used were anti-GFP and anti-Ub. Primers are shown in Table S1.

493

#### 494 **Co-immunoprecipitation (Co-IP) assay**

495 The full-length *SmDDA1b* was cloned into pAC004-HA vector to produce SmDDA1b-HA  
496 antibody, and *SmNAC* was cloned into pAC402-GFP vector. The *Agrobacterium tumefaciens*  
497 with GFP-tagged empty plasmid, *SmNAC* recombinant plasmid, and HA-tagged *SmDDA1b*  
498 recombinant vector was diluted in infection buffer to OD<sub>600</sub>=1.2. pAC402-X (Vec or SmNAC)  
499 and pAC004-*SmDDA1b* (v:v, 1: 1) was then added to the sample to co-infect tobacco. The  
500 samples were obtained after 48 h of infection, then lysed to obtain input. Western blot was used

501 to detect the expression. GFP-Trap agarose magnetic beads with immobilized GFP antibody  
502 were used to incubate the protein at 4 °C for 1 h. The beads were put on a magnetic stand for 1  
503 min and washed twice with the wash buffer (50 mM Tris-HCl, 5 mM EDTA, 250 mM NaCl, 1  
504 mM PMSF, 10% glycerol, pH 7.5). A loading buffer was added, then boiled and centrifuged to  
505 obtain supernatant (IP sample). Western blot was used to check. Primers are listed in Table S1.

506

### 507 **Promoter isolation and element prediction**

508 Download the eggplant genome data from Sol Genomics NetWork (<https://solgenomics.net>)  
509 (Barchi *et al.*, 2021). TBtools v1.09852 (Chen *et al.*, 2020) was used to blast the genome to  
510 find out the *SmDDA1b* gene, the 1474bp fragment before the *SmDDA1b* gene was taken as the  
511 promoter sequence, and Primerstar (Takara, Beijing) was used to clone the promoter. PlantPAN  
512 3.0 (<http://plantpan.itps.ncku.edu.tw>) (Chow *et al.*, 2019) was used to predict the position of  
513 the NAC element on the promoter. Primers are shown in Table S1.

514

### 515 **Yeast two-hybrid (Y1H) assay**

516 The full-length coding sequence *SmNAC* was cloned into pGADT7. The promoter fragment  
517 of *SmDDA1b* was ligated into the pAbAi vector to generate baits. The Y1H experiment was  
518 carried out according to the manufacturer's protocol for the Matchmaker Gold Y1H library  
519 screening system (Clontech, USA). The primers are listed in Table S1.

520

### 521 **Dual-luciferase assay**

522 The 1474 bp promoters of *SmDDA1b* was inserted into the pGreen II 0800-LUC vector as  
523 reporters, while pGreenII 62-SK-*SmNAC*, pGreenII 62-SK-*SmDDA1b* and empty pGreenII 62-  
524 SK served as effectors. The *Agrobacterium tumefaciens* strain GV3101 containing the  
525 corresponding effectors and reporters (v: v, 20: 1) were infiltrated into healthy *N. benthamiana*  
526 leaves. After incubation for 24- 36 h, MG132 (50 μM) was injected into leaves. After  
527 incubation for three to four days, the firefly LUC and Renilla LUC activities were measured by  
528 Dual Luciferase Reporter Gene Assay Kit (Yeasen, Shanghai) and Cytation 5 Cell Imaging  
529 Multi-Mode Reader (BioTek, USA). Activity is expressed as the ratio of firefly LUC activity to  
530 Renilla LUC activity. The primers are listed in Table S1.

531 **Accession numbers**

532 The GenBank accession number of *SmDDA1b*: MZ736671.

533

534 **Supporting Information**

535 Fig. S1. *SmDDA1b* gene and amino acid sequence.

536 Fig. S2. *SmDDA1b* gene cDNA sequence in E31 and E32.

537 Fig. S3. Detection of disease resistance of E31 and E32 to *Ralstonia solanacearum* species  
538 complex (RSSC).

539 Fig. S4. The subcellular localization results of *SmDDA1b*.

540 Fig. S5. There is no interaction between *SmDDA1b* and ICS1.

541 Fig. S6. *SmDDA1b* promotor sequence.

542 Fig. S7. *SmDDA1bpro-2-3* has self-activation.

543 Table S1 List of primers.

544 Table S2 List of primers used for qPCR.

545 Table S3 A statistical table of 14 species and their genome accession numbers used in the  
546 *SmDDA1b* phylogenetic tree except for eggplant.

547 Table S4 List of plant incidence rate and disease index for testing the resistance of E31 and  
548 E32 to *Ralstonia solanacearum* species complex.

549 Table S5 List of *bar* gene test results of T<sub>1</sub> generation.

550 Table S6 List of plant incidence rate and disease index in overexpression experiment.

551 Table S7 List of NAC transcription factor binding sites.

552

553 **Acknowledgements**

554 We thank Lianhui Zhang (South China Agricultural University) for providing GMI1000 strain.

555

556 **Figure legends**

557 Figure 1. Interaction between *SmDDA1b* and *SmNAC* in the yeast two-hybrid (Y2H) system.

558 A, Y2H results of *SmNAC* and *SmDDA1b*. The co-transformation of BD-53, BD-*Lam* and

559 AD-*T* with Y2H Gold as a positive or negative control. B, *SmDDA1b* phylogeny analysis

560 results. The number on the branch represents the degree of support, and the maximum value is

561 100. The genome accession number of the gene is shown in Table S3.

562

563 Figure 2. Interaction between SmDDA1b and SmNAC in the nucleus and *in vitro*. A,  
564 Bimolecular fluorescence complementation (BiFC) results of SmDDA1b and SmNAC. The  
565 proteasome inhibitor MG132 was injected after co-injection of YNE-*SmDDA1b* and YCE-  
566 *SmNAC* *Agrobacterium tumefaciens* in tobacco. YFP indicates yellow fluorescence caused by  
567 the interaction between two proteins. NLS indicates the location of the nucleus. The red and  
568 white rulers indicate 1 mm. B, The result of E3 ubiquitin ligase activity of SmDDA1b. The  
569 symbols "-" and "+" indicate samples not added and those added in the experiment,  
570 respectively. A single band represents the SmDDA1b protein, and a ladder-like smear  
571 represents the polyubiquitination of SmDDA1b. C, SmNAC ubiquitination via SmDDA1b *in*  
572 *vitro*. A single band represents the SmNAC protein, and the ladder-like smear represents the  
573 polyubiquitination of SmNAC.

574

575 Figure 3. *In vivo* ubiquitination experiment results of SmDDA1b and SmNAC. A, Co-  
576 immunoprecipitation (Co-IP) experiment results. Anti-GFP and anti-HA were used for WB  
577 detection. B, *In vivo* SmNAC ubiquitination via SmDDA1b. The symbols "-" and "+" indicate  
578 samples not added and those added in the experiment, respectively. C, Effect of SmDDA1b-  
579 GFP *Agrobacterium tumefaciens* on the expression level of SmNAC protein. Different numbers  
580 represent different injection ratios. Anti-Myc and anti-GFP were used for WB detection, and  
581 actin was used as a control.

582

583 Figure 4. Expression analysis of *SmDDA1b*. A, The relative expression of SmDDA1b in E31  
584 and E32 tissues. The left part shows a schematic diagram of the tissue parts of eggplant  
585 seedlings (leaves, upper and lower parts of the stems, and roots). The bar graph shows the  
586 relative expression of *SmDDA1b* in the roots, stems-part1, stems-part2, and leaves of eggplant  
587 E31 and E32. Data are expressed as mean  $\pm$  SD (n=3) (\*,  $p < 0.05$ ; \*\*,  $p < 0.01$ , according to  
588 Student's t-test). The white ruler indicates 5 cm. B, The analysis of the relative expression of  
589 *SmDDA1b* after 24 h of E31 and E32 inoculation with pathogen. The samples were obtained at  
590 0 h, 1 h, 3 h, 6 h, 12 h and 24 h after treatment. C, The relative expression of *SmDDA1b* after

591 48 h of E31 and E32 treatment with SA. The samples were obtained at 0 h, 3 h, 6 h, 12 h, 24h  
592 and 48 h after treatment. Data are expressed as mean  $\pm$  SEM of three biological replicates. The  
593 letter notation indicates the results of multiple comparisons between the data ( $p < 0.05$ ).

594

595 Figure 5. Virus-induced gene silencing (VIGS) experiment results of *SmDDA1b* in E31. A, The  
596 relative expression results of *SmDDA1b* and *SmNAC* in *SmDDA1b*-silenced plants. pTRV2  
597 represents the control group, and p-*SmDDA1b* indicates VIGS-treated plants pTRV2-  
598 *SmDDA1b*. Data are expressed as mean  $\pm$  SEM of three biological replicates (\*\*,  $p < 0.01$ ,  
599 according to Student's t-test). B, The phenotype of E31 VIGS control and treated plants  
600 infected with *Ralstonia solanacearum* species complex (RSSC) for four weeks. The white ruler  
601 indicates 5 cm. C, The results of VIGS and control plant disease index four weeks after  
602 inoculation with RSSC. The evaluation scale was as follows: 0= healthy, 1= one or two leaves,  
603 wilted, 2= three or more leaves wilted, 3= all leaves wilted, and 4= dead (Qiu *et al.*, 2019). The  
604 ordinate represents the percentage of the number of plants in each disease level. Ten E31  
605 seedlings were silenced.

606

607 Figure 6. Results of overexpression experiment. A, Detection of the marker gene *bar* on tomato  
608 tissue culture seedlings. B, The relative expression of *SmDDA1b* in tomato independent lines  
609 obtained from tissue culture. Data are expressed as mean  $\pm$  SD (n=3) (\*,  $p < 0.05$ ; \*\*,  $p < 0.01$ ,  
610 according to Student's t-test). C, The phenotype of wild-type (WT) and T<sub>1</sub> generation  
611 overexpressed seedlings (OET<sub>1</sub>), including front view, close view, and top view on the 7<sup>th</sup> day  
612 after inoculation with RSSC. The white ruler indicates 5 cm. D, The phenotype of WT and  
613 OET<sub>1</sub> on the 14<sup>th</sup> day post-inoculation with RSSC. CK represents WT and transgenic tomato  
614 seedlings that were not inoculated with RSSC. The white ruler indicates 1 dm. E-F, The  
615 morbidity statistics and disease index of WT and overexpressed seedlings after 14 days of  
616 inoculation. OET<sub>1</sub> represents the average disease index of three overexpressed lines. G, SA  
617 content of WT and overexpressed tomato seedlings inoculated or not inoculated with RSSC.  
618 The letters indicate significant differences ( $p < 0.05$ ). H, The relative expression of *SmNAC* in  
619 *SmDDA1b* overexpressed lines. Data are expressed as mean  $\pm$  SEM of three biological  
620 replicates (\*,  $p < 0.05$ ; \*\*,  $p < 0.01$ , Student's t-test).

621

622 Figure 7. Expression of *ICS1* and salicylic acid (SA) pathway signal-related genes in  
623 *SmDDA1b* overexpressed and virus-induced gene silencing (VIGS) plants. A, Expression of  
624 *ICS1* in *SmDDA1b* overexpression and VIGS plants. B, Expression of SA pathway signal-  
625 related genes in overexpressed plants. OET<sub>0</sub> represents the T<sub>0</sub> generation overexpressed plants.  
626 and WT represents the wild-type plants. C, Expression of SA pathway signal-related genes in  
627 VIGS plants. pTRV2 represents control plants, and p-*SmDDA1b* represents VIGS-treated  
628 plants pTRV2-*SmDDA1b*. Data are expressed as mean ± SEM of three biological replicates (\*,  
629  $p < 0.05$ ; \*\*,  $p < 0.01$ , Student's t-test).

630

631 Figure 8. SmNAC binds to the *SmDDA1b* promoter and represses the expression of *SmDDA1b*  
632 gene. A, The relative expression of *SmDDA1b* in *SmNAC* over-expressed lines. E31 indicates  
633 wild-type, and EGT<sub>0-43</sub>, EGT<sub>0-87</sub>, EGT<sub>0-145</sub>, EGT<sub>0-204</sub> represent T<sub>0</sub> generation over-expressed  
634 plants. Data are expressed as mean ± SEM of three biological replicates (\*\*,  $p < 0.01$ , Student's  
635 t-test). B, Schematic diagram of *SmDDA1b* gene, promoter and NAC element binding sites.  
636 "+" represents the sense strand and "-" represents the antisense strand. The promoter of  
637 *SmDDA1b* was divided into three segments for Y1H assay. The second segment had self-  
638 activation and it was divided into three segments for Y1H with SmNAC transcription factor.  
639 *SmDDA1bpro-1*: -855 to -1542 bp, *SmDDA1bpro-2*: -308 to -854 bp (*SmDDA1bpro-2-1*: -675  
640 to -854 bp, *SmDDA1bpro-2-2*: -495 to -674 bp, *SmDDA1bpro-2-3*: -308 to -494 bp),  
641 *SmDDA1bpro-3*: -1 to -307 bp. C, SmNAC binds directly to the SmDDA1b promoter. The co-  
642 transformation of AD-53, AD and pAbAi-p53 with Y1H Gold as a positive or negative control.  
643 The triangle indicates the yeast concentration from high to low. D, A schematic representation  
644 of the double reporter and effector plasmid used. The double-reporter plasmid contained  
645 *SmDDA1b* promoter fused with the sequence encoding LUC luciferase and REN luciferase  
646 driven by *CaMV35S* promoter. The effector plasmid contained *SmNAC* driven by a *CaMV35S*  
647 promoter. E, SmDDA1b attenuates the inhibitory effect of SmNAC on SmDDA1b promoter.  
648 The regulation of transcription factor on promoter activity is based on the ratio of LUC to REN.  
649 The symbols "-" and "+" indicate samples not added and those added in the experiment,  
650 respectively. EV represent empty vector. Data are expressed as mean ± SEM of three biological

651 replicates. The letter notation indicates the results of multiple comparisons between the data  
652 ( $p < 0.05$ ).

653

654 Figure 9. A proposed model for the action mechanism of SmDDA1b. A, SmNAC inhibited the  
655 expression level of *SmDDA1b* and *ICSI* under normal condition. B, The regulation module of  
656 SmDDA1b improving plant resistance to BW. The expression of SmDDA1b increased under  
657 RSSC stress weakens the SmNAC-mediated inhibition of *SmDDA1b*. Moreover, SmNAC-  
658 mediated inhibition of *ICSI* was relieved by SmDDA1b-mediated ubiquitination of SmNAC,  
659 and thus SA accumulation.

660

661

## Parsed Citations

**Adams EHG, Spoel SH (2018) The ubiquitin–proteasome system as a transcriptional regulator of plant immunity. *Journal of Experimental Botany* 69: 4529-4537**

Google Scholar: [Author Only](#) [Title Only](#) [Author and Title](#)

**Barchi L, Rabanus-Wallace MT, Prohens J, Toppino L, Padmarasu S, Portis E, Rotino GL, Stein N, Lanteri S, Giuliano G (2021) Improved genome assembly and pan-genome provide key insights on eggplant domestication and breeding. *The Plant Journal***

Google Scholar: [Author Only](#) [Title Only](#) [Author and Title](#)

**Boschi F, Schwartzman C, Murchio S, Ferreira V, Siri MI, Galván GA, Smoker M, Stransfeld L, Zipfel C, Vilaró FL (2017) Enhanced bacterial wilt resistance in potato through expression of Arabidopsis EFR and introgression of quantitative resistance from *Solanum commersonii*. *Frontiers in plant science* 8: 1642**

Google Scholar: [Author Only](#) [Title Only](#) [Author and Title](#)

**Chang Y, Yu R, Feng J, Chen H, Eri H, Gao G (2020) NAC transcription factor involves in regulating bacterial wilt resistance in potato. *Functional Plant Biology* 47: 925-936**

Google Scholar: [Author Only](#) [Title Only](#) [Author and Title](#)

**Checker VG, Kushwaha HR, Kumari P, Yadav S (2018) Role of phytohormones in plant defense: signaling and cross talk. In *Molecular aspects of plant-pathogen interaction*. Springer, pp 159-184**

Google Scholar: [Author Only](#) [Title Only](#) [Author and Title](#)

**Chen C, Chen H, Zhang Y, Thomas HR, Frank MH, He Y, Xia R (2020) TBtools: an integrative toolkit developed for interactive analyses of big biological data. *Molecular plant* 13: 1194-1202**

Google Scholar: [Author Only](#) [Title Only](#) [Author and Title](#)

**Chen IH, Chang JE, Wu CY, Huang YP, Hsu YH, Tsai CH (2019) An E3 ubiquitin ligase from *Nicotiana benthamiana* targets the replicase of Bamboo mosaic virus and restricts its replication. *Molecular plant pathology* 20: 673-684**

Google Scholar: [Author Only](#) [Title Only](#) [Author and Title](#)

**Chen YY, Lin YM, Chao TC, Wang JF, Liu AC, Ho FI, Cheng CP (2009) Virus-induced gene silencing reveals the involvement of ethylene-, salicylic acid- and mitogen-activated protein kinase-related defense pathways in the resistance of tomato to bacterial wilt. *Physiologia Plantarum* 136: 324-335**

Google Scholar: [Author Only](#) [Title Only](#) [Author and Title](#)

**Chen Z-Q, Zhao J-H, Chen Q, Zhang Z-H, Li J, Guo Z-X, Xie Q, Ding S-W, Guo H-S (2020) DNA geminivirus infection induces an imprinted E3 ligase gene to epigenetically activate viral gene transcription. *Plant Cell* 32: 3256-3272**

Google Scholar: [Author Only](#) [Title Only](#) [Author and Title](#)

**Chico JM, Lechner E, Fernandez-Barbero G, Canibano E, García-Casado G, Franco-Zorrilla JM, Hammann P, Zamarreño AM, García-Mina JM, Rubio V (2020) CUL3BPM E3 ubiquitin ligases regulate MYC2, MYC3, and MYC4 stability and JA responses. *Proceedings of the National Academy of Sciences* 117: 6205-6215**

Google Scholar: [Author Only](#) [Title Only](#) [Author and Title](#)

**Choi C, Hwang SH, Fang IR, Kwon SI, Park SR, Ahn I, Kim JB, Hwang DJ (2015) Molecular characterization of *Oryza sativa* WRKY 6, which binds to W-box-like element 1 of the *Oryza sativa* pathogenesis-related (PR) 10a promoter and confers reduced susceptibility to pathogens. *New Phytologist* 208: 846-859**

Google Scholar: [Author Only](#) [Title Only](#) [Author and Title](#)

**Chow C-N, Lee T-Y, Hung Y-C, Li G-Z, Tseng K-C, Liu Y-H, Kuo P-L, Zheng H-Q, Chang W-C (2019) PlantPAN3. 0: a new and updated resource for reconstructing transcriptional regulatory networks from ChIP-seq experiments in plants. *Nucleic acids research* 47: D1155-D1163**

Google Scholar: [Author Only](#) [Title Only](#) [Author and Title](#)

**Cui H, Gobbato E, Kracher B, Qiu J, Bautor J, Parker JE (2017) A core function of EDS1 with PAD4 is to protect the salicylic acid defense sector in *Arabidopsis* immunity. *New Phytologist* 213: 1802-1817**

Google Scholar: [Author Only](#) [Title Only](#) [Author and Title](#)

**Dempsey DMA, Viot AC, Wildermuth MC, Klessig DF (2011) Salicylic acid biosynthesis and metabolism. *The Arabidopsis book/American Society of Plant Biologists* 9**

Google Scholar: [Author Only](#) [Title Only](#) [Author and Title](#)

**Derksen H, Rampitsch C, Daayf F (2013) Signaling cross-talk in plant disease resistance. *Plant science* 207: 79-87**

Google Scholar: [Author Only](#) [Title Only](#) [Author and Title](#)

**Ding M, Zhang K, He Y, Zuo Q, Zhao H, He M, Georgiev MI, Park SU, Zhou M (2021) FtBPM3 modulates the orchestration of FtMYB11-mediated flavonoids biosynthesis in Tartary buckwheat. *Plant Biotechnology Journal* 19: 1285**

Google Scholar: [Author Only](#) [Title Only](#) [Author and Title](#)

**Ding Y, Sun T, Ao K, Peng Y, Zhang Y, Li X, Zhang Y (2018) Opposite roles of salicylic acid receptors NPR1 and NPR3/NPR4 in transcriptional regulation of plant immunity. *Cell* 173: 1454-1467. e1415**



Google Scholar: [Author Only](#) [Title Only](#) [Author and Title](#)

**Durgeon G, Jupin I (2002) Stability in vitro of the 69K movement protein of Turnip yellow mosaic virus is regulated by the ubiquitin-mediated proteasome pathway. Journal of general virology 83: 3187-3197**

Google Scholar: [Author Only](#) [Title Only](#) [Author and Title](#)

**Eddy SR (1998) Profile hidden Markov models. Bioinformatics (Oxford, England) 14: 755-763**

Google Scholar: [Author Only](#) [Title Only](#) [Author and Title](#)

**Feys BJ, Moisan LJ, Newman MA, Parker JE (2001) Direct interaction between the Arabidopsis disease resistance signaling proteins, EDS1 and PAD4. The EMBO journal 20: 5400-5411**

Google Scholar: [Author Only](#) [Title Only](#) [Author and Title](#)

**Garcion C, Lohmann A, Lamodière E, Catinot J, Buchala A, Doermann P, Métraux J-P (2008) Characterization and biological function of the ISOCHORISMATE SYNTHASE2 gene of Arabidopsis. Plant physiology 147: 1279-1287**

Google Scholar: [Author Only](#) [Title Only](#) [Author and Title](#)

**Gong C, Su H, Li Z, Mai P, Sun B, Li Z, Heng Z, Xu X, Yang S, Li T (2021) Involvement of histone acetylation in tomato resistance to *Ralstonia solanacearum*. Scientia Horticulturae 285: 110163**

Google Scholar: [Author Only](#) [Title Only](#) [Author and Title](#)

**Hayward A (1991) Biology and epidemiology of bacterial wilt caused by *Pseudomonas solanacearum*. Annual review of phytopathology 29: 65-87**

Google Scholar: [Author Only](#) [Title Only](#) [Author and Title](#)

**Hernández Y, Sanan-Mishra N (2017) miRNA mediated regulation of NAC transcription factors in plant development and environment stress response. Plant Gene 11: 190-198**

Google Scholar: [Author Only](#) [Title Only](#) [Author and Title](#)

**Huang Q, Allen C (2000) Polygalacturonases are required for rapid colonization and full virulence of *Ralstonia solanacearum* on tomato plants. Physiological and molecular plant pathology 57: 77-83**

Google Scholar: [Author Only](#) [Title Only](#) [Author and Title](#)

**Hussain A, Li X, Weng Y, Liu Z, Ashraf MF, Noman A, Yang S, Ifnan M, Qiu S, Yang Y (2018) CaWRKY22 acts as a positive regulator in pepper response to *Ralstonia solanacearum* by constituting networks with CaWRKY6, CaWRKY27, CaWRKY40, and CaWRKY58. International journal of molecular sciences 19: 1426**

Google Scholar: [Author Only](#) [Title Only](#) [Author and Title](#)

**Irigoyen ML, Iniesto E, Rodriguez L, Puga MI, Yanagawa Y, Pick E, Strickland E, Paz-Ares J, Wei N, De Jaeger G (2014) Targeted degradation of abscisic acid receptors is mediated by the ubiquitin ligase substrate adaptor DDA1 in Arabidopsis. The Plant Cell 26: 712-728**

Google Scholar: [Author Only](#) [Title Only](#) [Author and Title](#)

**Jia C, Zhang L, Liu L, Wang J, Li C, Wang Q (2013) Multiple phytohormone signalling pathways modulate susceptibility of tomato plants to *Alternaria alternata* f. sp. *lycopersici*. Journal of experimental botany 64: 637-650**

Google Scholar: [Author Only](#) [Title Only](#) [Author and Title](#)

**Karki SJ, Reilly A, Zhou B, Mascarello M, Burke J, Doohan F, Douchkov D, Schweizer P, Feechan A (2021) A small secreted protein from *Zymoseptoria tritici* interacts with a wheat E3 ubiquitin ligase to promote disease. Journal of experimental botany 72: 733-746**

Google Scholar: [Author Only](#) [Title Only](#) [Author and Title](#)

**Katoh K, Standley DM (2013) MAFFT multiple sequence alignment software version 7: improvements in performance and usability. Molecular biology and evolution 30: 772-780**

Google Scholar: [Author Only](#) [Title Only](#) [Author and Title](#)

**Kim B-S, French E, Caldwell D, Harrington EJ, Iyer-Pascuzzi AS (2016) Bacterial wilt disease: Host resistance and pathogen virulence mechanisms. Physiological and Molecular Plant Pathology 95: 37-43**

Google Scholar: [Author Only](#) [Title Only](#) [Author and Title](#)

**Kunwar S, Iriarte F, Fan Q, Evaristo da Silva E, Ritchie L, Nguyen NS, Freeman JH, Stall RE, Jones JB, Minsavage GV (2018) Transgenic expression of EFR and Bs2 genes for field management of bacterial wilt and bacterial spot of tomato. Phytopathology 108: 1402-1411**

Google Scholar: [Author Only](#) [Title Only](#) [Author and Title](#)

**Lee D, Lal NK, Lin Z-JD, Ma S, Liu J, Castro B, Toruño T, Dinesh-Kumar SP, Coaker G (2020) Regulation of reactive oxygen species during plant immunity through phosphorylation and ubiquitination of RBOHD. Nature communications 11: 1-16**

Google Scholar: [Author Only](#) [Title Only](#) [Author and Title](#)

**Lemessa F, Zeller W (2007) Isolation and characterisation of *Ralstonia solanacearum* strains from Solanaceae crops in Ethiopia. Journal of Basic Microbiology 47: 40-49**

Google Scholar: [Author Only](#) [Title Only](#) [Author and Title](#)

**Li F, Huang C, Li Z, Zhou X (2014) Suppression of RNA silencing by a plant DNA virus satellite requires a host calmodulin-like protein to repress RDR6 expression. PLoS pathogens 10: e1003921**

Google Scholar: [Author Only](#) [Title Only](#) [Author and Title](#)

**Li N, Han X, Feng D, Yuan D, Huang L-J (2019) Signaling crosstalk between salicylic acid and ethylene/jasmonate in plant defense: do we understand what they are whispering? International Journal of Molecular Sciences 20: 671**

**Li S, Lin Y-CJ, Wang P, Zhang B, Li M, Chen S, Shi R, Tunlaya-Anukit S, Liu X, Wang Z (2019) The AREB1 transcription factor influences histone acetylation to regulate drought responses and tolerance in Populus trichocarpa. The Plant Cell 31: 663-686**

Google Scholar: [Author Only](#) [Title Only](#) [Author and Title](#)

**Lindgren PB (1997) The role of hrp genes during plant-bacterial interactions. Annual review of phytopathology 35: 129-152**

Google Scholar: [Author Only](#) [Title Only](#) [Author and Title](#)

**Liu Q, Liu Y, Tang Y, Chen J, Ding W (2017) Overexpression of NtWRKY50 increases resistance to Ralstonia solanacearum and alters salicylic acid and jasmonic acid production in tobacco. Frontiers in plant science 8: 1710**

Google Scholar: [Author Only](#) [Title Only](#) [Author and Title](#)

**Liu Y, Hou J, Wang X, Li T, Majeed U, Hao C, Zhang X (2020) The NAC transcription factor NAC019-A1 is a negative regulator of starch synthesis in wheat developing endosperm. Journal of experimental botany 71: 5794-5807**

Google Scholar: [Author Only](#) [Title Only](#) [Author and Title](#)

**Liu Y, Tang Y, Tan X, Ding W (2021) NtRNF217, Encoding a Putative RBR E3 Ligase Protein of Nicotiana tabacum, Plays an Important Role in the Regulation of Resistance to Ralstonia solanacearum Infection. International journal of molecular sciences 22: 5507**

Google Scholar: [Author Only](#) [Title Only](#) [Author and Title](#)

**Livak KJ, Schmittgen TD (2001) Analysis of relative gene expression data using real-time quantitative PCR and the 2<sup>-</sup>ΔΔCT method. methods 25: 402-408**

Google Scholar: [Author Only](#) [Title Only](#) [Author and Title](#)

**Lowe-Power TM, Jacobs JM, Ailloud F, Fochs B, Prior P, Allen C (2016) Degradation of the plant defense signal salicylic acid protects Ralstonia solanacearum from toxicity and enhances virulence on tobacco. MBio 7: e00656-00616**

Google Scholar: [Author Only](#) [Title Only](#) [Author and Title](#)

**Lu P-P, Yu T-F, Zheng W-J, Chen M, Zhou Y-B, Chen J, Ma Y-Z, Xi Y-J, Xu Z-S (2018) The wheat Bax Inhibitor-1 protein interacts with an aquaporin TaPIP1 and enhances disease resistance in Arabidopsis. Frontiers in plant science 9: 20**

Google Scholar: [Author Only](#) [Title Only](#) [Author and Title](#)

**Ma J, Chen J, Wang M, Ren Y, Wang S, Lei C, Cheng Z (2018) Disruption of OsSEC3A increases the content of salicylic acid and induces plant defense responses in rice. Journal of experimental botany 69: 1051-1064**

Google Scholar: [Author Only](#) [Title Only](#) [Author and Title](#)

**Mahesh HM, Sharada MS (2018) Histopathological response of resistance induced by salicylic acid during brinjal (Solanum melongena L.) - Verticillium dahliae interaction. Journal of Applied Biology & Biotechnology 6**

Google Scholar: [Author Only](#) [Title Only](#) [Author and Title](#)

**Mansfield J, Genin S, Magori S, Citovsky V, Sriariyanum M, Ronald P, Dow M, Verdier V, Beer SV, Machado MA (2012) Top 10 plant pathogenic bacteria in molecular plant pathology. Molecular plant pathology 13: 614-629**

Google Scholar: [Author Only](#) [Title Only](#) [Author and Title](#)

**Marino D, Froidure S, Canonne J, Khaled SB, Khafif M, Pouzet C, Jauneau A, Roby D, Rivas S (2013) Arabidopsis ubiquitin ligase MIEL1 mediates degradation of the transcription factor MYB30 weakening plant defence. Nature communications 4: 1-9**

Google Scholar: [Author Only](#) [Title Only](#) [Author and Title](#)

**Marques ANJ, Palanimurugan R, Matias AC, Ramos PC, Dohmen RJR (2009) Catalytic mechanism and assembly of the proteasome. Chemical Reviews 109: 1509-1536**

Google Scholar: [Author Only](#) [Title Only](#) [Author and Title](#)

**McGarvey J, Denny T, Schell M (1999) Spatial-temporal and quantitative analysis of growth and EPS I production by Ralstonia solanacearum in resistant and susceptible tomato cultivars. Phytopathology 89: 1233-1239**

Google Scholar: [Author Only](#) [Title Only](#) [Author and Title](#)

**McLellan H, Chen K, He Q, Wu X, Boevink PC, Tian Z, Birch PR (2020) The ubiquitin E3 ligase PUB17 positively regulates immunity by targeting a negative regulator, KH17, for degradation. Plant communications 1: 100020**

Google Scholar: [Author Only](#) [Title Only](#) [Author and Title](#)

**Miao M, Niu X, Kud J, Du X, Avila J, Devarenne TP, Kuhl JC, Liu Y, Xiao F (2016) The ubiquitin ligase SEVEN IN ABSENTIA (SINA) ubiquitinates a defense-related NAC transcription factor and is involved in defense signaling. New Phytol 211: 138-148**

Google Scholar: [Author Only](#) [Title Only](#) [Author and Title](#)

**Morel A, Guinard J, Lonjon F, Sujeeun L, Barberis P, Genin S, Vaillau F, Daunay MC, Dintinger J, Poussier S (2018) The eggplant AG91-25 recognizes the type III-secreted effector RipAX2 to trigger resistance to bacterial wilt (Ralstonia solanacearum species complex). Molecular plant pathology 19: 2459-2472**

Google Scholar: [Author Only](#) [Title Only](#) [Author and Title](#)

**Morreale FE, Walden H (2016) Types of Ubiquitin Ligases. Cell 165: 248-248 e241**

Google Scholar: [Author Only](#) [Title Only](#) [Author and Title](#)

**Na C, Shuanghua W, Jinglong F, Bihao C, Jianjun L, Changming C, Jin J (2016) Overexpression of the eggplant (*Solanum melongena*) NAC family transcription factor S mNAC suppresses resistance to bacterial wilt. Scientific reports 6: 1-20**

Google Scholar: [Author Only](#) [Title Only](#) [Author and Title](#)

**Nakano M, Mukaihara T (2018) *Ralstonia solanacearum* type III effector RipAL targets chloroplasts and induces jasmonic acid production to suppress salicylic acid-mediated defense responses in plants. Plant and Cell Physiology 59: 2576-2589**

Google Scholar: [Author Only](#) [Title Only](#) [Author and Title](#)

**Nakano M, Oda K, Mukaihara T (2017) *Ralstonia solanacearum* novel E3 ubiquitin ligase (NEL) effectors RipAW and RipAR suppress pattern-triggered immunity in plants. Microbiology 163: 992-1002**

Google Scholar: [Author Only](#) [Title Only](#) [Author and Title](#)

**Narusaka M, Hatakeyama K, Shirasu K, Narusaka Y (2014) Arabidopsis dual resistance proteins, both RPS4 and RRS1, are required for resistance to bacterial wilt in transgenic Brassica crops. Plant signaling & behavior 9: e29130**

Google Scholar: [Author Only](#) [Title Only](#) [Author and Title](#)

**Nguyen L-T, Schmidt HA, Von Haeseler A, Minh BQ (2015) IQ-TREE: a fast and effective stochastic algorithm for estimating maximum-likelihood phylogenies. Molecular biology and evolution 32: 268-274**

Google Scholar: [Author Only](#) [Title Only](#) [Author and Title](#)

**O'Leary NA, Wright MW, Brister JR, Ciuffo S, Haddad D, McVeigh R, Rajput B, Robbertse B, Smith-White B, Ako-Adjei D (2016) Reference sequence (RefSeq) database at NCBI: current status, taxonomic expansion, and functional annotation. Nucleic acids research 44: D733-D745**

Google Scholar: [Author Only](#) [Title Only](#) [Author and Title](#)

**Oh S-K, Kim H, Choi D (2014) Rpi-blb2-mediated late blight resistance in *Nicotiana benthamiana* requires SGT1 and salicylic acid-mediated signaling but not RAR1 or HSP90. FEBS letters 588: 1109-1115**

Google Scholar: [Author Only](#) [Title Only](#) [Author and Title](#)

**Olma MH, Roy M, Le Bihan T, Sumara I, Maerki S, Larsen B, Quadroni M, Peter M, Tyers M, Pintard L (2009) An interaction network of the mammalian COP9 signalosome identifies Dda1 as a core subunit of multiple Cul4-based E3 ligases. Journal of cell science 122: 1035-1044**

Google Scholar: [Author Only](#) [Title Only](#) [Author and Title](#)

**Pang P-X, Shi L, Wang X-J, Chang Y-N, Luo Y-P, Feng J-L, Eri H, Gao G (2019) Cloning and expression analysis of the StCUL1 gene in potato. Journal of Plant Biochemistry and Biotechnology 28: 460-469**

Google Scholar: [Author Only](#) [Title Only](#) [Author and Title](#)

**Park S-R, Cha E-M, Kim T-H, Han S-Y, Hwang D-J, Ahn I-P, Cho K-S, Bae S-C (2012) Isolation of Potato StACRE Gene and Its Function in Resistance against Bacterial Wilt Disease. Journal of Life Science 22: 177-183**

Google Scholar: [Author Only](#) [Title Only](#) [Author and Title](#)

**Patil VU, Gopal J, Singh B (2012) Improvement for bacterial wilt resistance in potato by conventional and biotechnological approaches. Agricultural research 1: 299-316**

Google Scholar: [Author Only](#) [Title Only](#) [Author and Title](#)

**Pauwels L, Ritter A, Goossens J, Durand AN, Liu H, Gu Y, Geerinck J, Boter M, Vanden Bossche R, De Clercq R (2015) The ring e3 ligase keep on going modulates jasmonate zim-domain12 stability. Plant Physiology 169: 1405-1417**

Google Scholar: [Author Only](#) [Title Only](#) [Author and Title](#)

**Pickart CM, Fushman D (2004) Polyubiquitin chains: polymeric protein signals. Curr Opin Chem Biol 8: 610-616**

Google Scholar: [Author Only](#) [Title Only](#) [Author and Title](#)

**Poueymiro M, Genin S (2009) Secreted proteins from *Ralstonia solanacearum*: a hundred tricks to kill a plant. Current opinion in microbiology 12: 44-52**

Google Scholar: [Author Only](#) [Title Only](#) [Author and Title](#)

**Qiu Z, Wang X, Gao J, Guo Y, Huang Z, Du Y (2016) The tomato Hoffman's anthocyaninless gene encodes a bHLH transcription factor involved in anthocyanin biosynthesis that is developmentally regulated and induced by low temperatures. PloS one 11: e0151067**

Google Scholar: [Author Only](#) [Title Only](#) [Author and Title](#)

**Qiu Z, Yan S, Xia B, Jiang J, Yu B, Lei J, Chen C, Chen L, Yang Y, Wang Y (2019) The eggplant transcription factor MYB44 enhances resistance to bacterial wilt by activating the expression of spermidine synthase. Journal of experimental botany 70: 5343-5354**

Google Scholar: [Author Only](#) [Title Only](#) [Author and Title](#)

**Rowland O, Ludwig AA, Merrick CJ, Baillieux F, Tracy FE, Durrant WE, Fritz-Laylin L, Nekrasov V, Sjolander K, Yoshioka H, Jones JD (2005) Functional analysis of Avr9/Cf-9 rapidly elicited genes identifies a protein kinase, ACIK1, that is essential for full Cf-9-dependent disease resistance in tomato. Plant Cell 17: 295-310**

Google Scholar: [Author Only](#) [Title Only](#) [Author and Title](#)

**Safni I, Cleenwerck I, De Vos P, Fegan M, Sly L, Kappler U (2014) Polyphasic taxonomic revision of the *Ralstonia solanacearum* species complex: proposal to emend the descriptions of *Ralstonia solanacearum* and *Ralstonia syzygii* and reclassify current *R. syzygii* strains**

as *Ralstonia syzygii* subsp. *syzygii* subsp. nov., *R. solanacearum* phylotype IV strains as *Ralstonia syzygii* subsp. *indonesiensis* subsp. nov., banana blood disease bacterium strains as *Ralstonia syzygii* subsp. *celebesensis* subsp. nov. and *R. solanacearum* phylotype I and III strains as *Ralstoniapseudosolanacearum* sp. nov. *International journal of systematic and evolutionary microbiology* 64: 3087-3103

Google Scholar: [Author Only](#) [Title Only](#) [Author and Title](#)

Shabek N, Ruble J, Waston CJ, Garbutt KC, Hinds TR, Li T, Zheng N (2018) Structural insights into DDA1 function as a core component of the CRL4-DDB1 ubiquitin ligase. *Cell discovery* 4: 1-4

Google Scholar: [Author Only](#) [Title Only](#) [Author and Title](#)

Shen Q, Hu T, Bao M, Cao L, Zhang H, Song F, Xie Q, Zhou X (2016) Tobacco RING E3 ligase NtRFP1 mediates ubiquitination and proteasomal degradation of a geminivirus-encoded  $\beta$ C1. *Molecular plant* 9: 911-925

Google Scholar: [Author Only](#) [Title Only](#) [Author and Title](#)

Stone SL, Hauksdóttir H, Troy A, Herschleb J, Kraft E, Callis J (2005) Functional Analysis of the RING-Type Ubiquitin Ligase Family of *Arabidopsis* s. *Plant physiology* 137: 13-30

Google Scholar: [Author Only](#) [Title Only](#) [Author and Title](#)

Sun B, Zhou X, Chen C, Chen C, Chen K, Chen M, Liu S, Chen G, Cao B, Cao F (2020) Coexpression network analysis reveals an MYB transcriptional activator involved in capsaicinoid biosynthesis in hot peppers. *Horticulture research* 7: 1-14

Google Scholar: [Author Only](#) [Title Only](#) [Author and Title](#)

Tahir HAS, Gu Q, Wu H, Niu Y, Huo R, Gao X (2017) *Bacillus volatiles* adversely affect the physiology and ultra-structure of *Ralstonia solanacearum* and induce systemic resistance in tobacco against bacterial wilt. *Scientific reports* 7: 1-15

Google Scholar: [Author Only](#) [Title Only](#) [Author and Title](#)

Tasset C, Bernoux M, Jauneau A, Pouzet C, Brière C, Kieffer-Jacquiod S, Rivas S, Marco Y, Deslandes L (2010) Autoacetylation of the *Ralstonia solanacearum* effector PopP2 targets a lysine residue essential for RRS1-R-mediated immunity in *Arabidopsis*. *PLoS pathogens* 6: e1001202

Google Scholar: [Author Only](#) [Title Only](#) [Author and Title](#)

Thrower JS, Hoffman L, Rechsteiner M, Pickart CM (2000) Recognition of the polyubiquitin proteolytic signal. *The EMBO journal* 19: 94-102

Google Scholar: [Author Only](#) [Title Only](#) [Author and Title](#)

Tong S, Chen N, Wang D, Ai F, Liu B, Ren L, Chen Y, Zhang J, Lou S, Liu H (2021) The U-box E3 ubiquitin ligase PalPUB79 positively regulates ABA-dependent drought tolerance via ubiquitination of PalWRKY77 in *Populus*. *Plant Biotechnology Journal*

Google Scholar: [Author Only](#) [Title Only](#) [Author and Title](#)

Wang H, Cheng Z, Wang B, Dong J, Ye W, Yu Y, Liu T, Cai X, Song B, Liu J (2020) Combining genome composition and differential gene expression analyses reveals that SmPGH1 contributes to bacterial wilt resistance in somatic hybrids. *Plant Cell Reports* 39: 1235-1248

Google Scholar: [Author Only](#) [Title Only](#) [Author and Title](#)

Wang W, Fan Y, Niu X, Miao M, Kud J, Zhou B, Zeng L, Liu Y, Xiao F (2018) Functional analysis of the seven in absentia ubiquitin ligase family in tomato. *Plant, cell & environment* 41: 689-703

Google Scholar: [Author Only](#) [Title Only](#) [Author and Title](#)

Wang Y, Yu B, Yan S, Qiu Z, Chen C, Lei J, Tian S, Cao B (2020) Advances in research on plant ubiquitin genes. *Chinese Agricultural Science Bulletin* 36: 14-22

Google Scholar: [Author Only](#) [Title Only](#) [Author and Title](#)

Wiermer M, Feys BJ, Parker JE (2005) Plant immunity: the EDS1 regulatory node. *Current opinion in plant biology* 8: 383-389

Google Scholar: [Author Only](#) [Title Only](#) [Author and Title](#)

Wildermuth MC, Dewdney J, Wu G, Ausubel FM (2001) Isochorismate synthase is required to synthesize salicylic acid for plant defence. *Nature* 414: 562-565

Google Scholar: [Author Only](#) [Title Only](#) [Author and Title](#)

Wu Y, Zhang D, Chu JY, Boyle P, Wang Y, Brindle ID, De Luca V, Després C (2012) The *Arabidopsis* NPR1 protein is a receptor for the plant defense hormone salicylic acid. *Cell reports* 1: 639-647

Google Scholar: [Author Only](#) [Title Only](#) [Author and Title](#)

Xi-ou X, Jing J, Na C, Jian-jun L, Ling-ling L, Bi-hao C (2016) Identification of Key Signal Gene Involved in Eggplant Bacterial Wilt-resistance. *Acta Horticulturae Sinica* 43: 1295

Google Scholar: [Author Only](#) [Title Only](#) [Author and Title](#)

Xi'ou X, Bihao C, Guannan L, Jianjun L, Qinghua C, Jin J, Yujing C (2015) Functional characterization of a putative bacterial wilt resistance gene (RE-bw) in eggplant. *Plant molecular biology reporter* 33: 1058-1073

Google Scholar: [Author Only](#) [Title Only](#) [Author and Title](#)

Xie Q, Guo H-S, Dallman G, Fang S, Weissman AM, Chua N-H (2002) SINAT5 promotes ubiquitin-related degradation of NAC1 to attenuate auxin signals. *Nature* 419: 167-170

Google Scholar: [Author Only](#) [Title Only](#) [Author and Title](#)

**Yanagawa Y, Sullivan JA, Komatsu S, Gusmaroli G, Suzuki G, Yin J, Ishibashi T, Saijo Y, Rubio V, Kimura S (2004) Arabidopsis COP10 forms a complex with DDB1 and DET1 in vivo and enhances the activity of ubiquitin conjugating enzymes. Genes & development 18: 2172-2181**

Google Scholar: [Author Only](#) [Title Only](#) [Author and Title](#)

**Yoshii M, Yamazaki M, Rakwal R, Kishi-Kaboshi M, Miyao A, Hirochika H (2010) The NAC transcription factor RIM1 of rice is a new regulator of jasmonate signaling. The Plant Journal 61: 804-815**

Google Scholar: [Author Only](#) [Title Only](#) [Author and Title](#)

**Yu G, Xian L, Xue H, Yu W, Rufian JS, Sang Y, Morcillo RJ, Wang Y, Macho AP (2020) A bacterial effector protein prevents MAPK-mediated phosphorylation of SGT1 to suppress plant immunity. PLoS pathogens 16: e1008933**

Google Scholar: [Author Only](#) [Title Only](#) [Author and Title](#)

**Zhang C, Wei Y, Xu L, Wu K-C, Yang L, Shi C-N, Yang G-Y, Chen D, Yu F-F, Xie Q (2020) A Bunyavirus-inducible ubiquitin ligase targets RNA polymerase IV for degradation during viral pathogenesis in rice. Molecular plant 13: 836-850**

Google Scholar: [Author Only](#) [Title Only](#) [Author and Title](#)

**Zhang L, Yao L, Zhang N, Yang J, Zhu X, Tang X, Calderón-Urrea A, Si H (2018) Lateral root development in potato is mediated by stum164 regulation of NAC transcription factor. Frontiers in plant science 9: 383**

Google Scholar: [Author Only](#) [Title Only](#) [Author and Title](#)

**Zhang Z, Chen H, Huang X, Xia R, Zhao Q, Lai J, Teng K, Li Y, Liang L, Du Q (2011) BSCTV C2 attenuates the degradation of SAMDC1 to suppress DNA methylation-mediated gene silencing in Arabidopsis. The Plant Cell 23: 273-288**

Google Scholar: [Author Only](#) [Title Only](#) [Author and Title](#)

**Zhao XY, Qi CH, Jiang H, Zhong MS, You CX, Li YY, Hao YJ (2020) MdWRKY15 improves resistance of apple to Botryosphaeria dothidea via the salicylic acid-mediated pathway by directly binding the MdlCS1 promoter. Journal of integrative plant biology 62: 527-543**

Google Scholar: [Author Only](#) [Title Only](#) [Author and Title](#)

**Zhu Y, Yan J, Liu W, Liu L, Sheng Y, Sun Y, Li Y, Scheller HV, Jiang M, Hou X (2016) Phosphorylation of a NAC transcription factor by a calcium/calmodulin-dependent protein kinase regulates abscisic acid-induced antioxidant defense in maize. Plant Physiology 171: 1651-1664**

Google Scholar: [Author Only](#) [Title Only](#) [Author and Title](#)

**Zimmerman ES, Schulman BA, Zheng N (2010) Structural assembly of cullin-RING ubiquitin ligase complexes. Current opinion in structural biology 20: 714-721**

Google Scholar: [Author Only](#) [Title Only](#) [Author and Title](#)
